# Supplementary material for: Transcriptome Profiling Reveals Higher Vertebrate Orthologous of Intra-Cytoplasmic Pattern Recognition Receptors in Grey Bamboo Shark
Source: PLoS One. 2014 Jun 23;9(6):e100018. doi: 10.1371/journal.pone.0100018 (PMC4067322; doi:10.1371/journal.pone.0100018)
Supplement: Table S1 — List of the GenBank accession numbers of the Toll-like receptor types, NOD1, NOD2, RIG-I, MDA5 and Urea transporter sequences used to determine the phylogenetic relationship of the sequence of Chiloscyllium griseum . (XLSX) [file pone.0100018.s006.xlsx]

## Sheet: Table S1
Details on the accession numbers of the TLR type sequences				Details on the accession numbers of the sequences used
used for the generation of phylogenetic tree				for the generation of phylogenetic tree (NOD1, 2, RIG-I and MDA5)
Gene name	Species	Accession ID		Gene	Species	Accession No.		Gene	Species	Accession No.
TLR1	Homo sapiens	U88540.1		NOD-1	Columba livia	XP_005510067.1		RIG-1	Chrysemys picta bellii	XM_005294762.1
TLR1	Mus musculus	AY009154.1		NOD-1	Gallus gallus	JX465487.1		RIG-1	Capra hircus	XM_005683566.1
TLR1	Tursiops truncatus	XM_004321018.1		NOD-1	Bos tarus	XM_598513.6		RIG-1	Bos tarus	DAA27040.1
TLR1	Sus scrofa	AB086376.1		NOD-1	Homo sapiens	AF113925.1		RIG-1	Homo sapiens	NM_014314.3
TLR1	Gallus gallus	AB109401.1		NOD-1	Mus musculus	AY160222.1		RIG-1	Pongo abelii	XM_002819715.1
TLR1	Ictalurus punctatus	HQ677713.1		NOD-1	Ornithorhynchus anatinus	XM_001512109.1		RIG-1	Canis lupus familiaries	XM_005626701.1
TLR1	Danio rerio	NM_001130593.1		NOD-1	Sarcophilus harrisii	XM_003772528.1		RIG-1	Mus musculus	AK155930
TLR1	Xenopus (Silurana) tropicalis	XM_002938656.2		NOD-1	Chrysemys picta bellii	XM_005278670.1		RIG-1	Equus caballus	XM_001497845
TLR1	Ochotona princeps	XM_004579325.1		NOD-1	Epinephelus coioides	JX220894.1		RIG-1	Ictalurus punctatus	NM_001278806
TLR2	Homo sapiens	NM_003264.3		NOD-1	Danio rerio	XM_002665060.3		RIG-1	Xenopus (Silurana) tropicalis	NM_001278806
TLR2	Bos taurus	NM_174197.2		NOD-1	Labeo rohita	JN794079.1		RIG-1	Cyprinus carpio	HQ850439.1
TLR2	Sus scrofa	NM_213761.1		NOD-1	Ictalurus punctatus	NM_001200067.1		RIG-1	Sus scrofa	EU126659.1
TLR2	Mus musculus	NM_011905.3		NOD-1	Canis lupus familiaris	XM_005628675.1		RIG-1	Ctenopharyngodon idella	GQ478334.2
TLR2	Tursiops truncatus	XM_004330423.1		NOD-1	Xenopus (Silurana) tropicalis	XM_002937854.2		RIG-1	Chiloscyllium griseum	3193515
TLR2	Sarcophilus harrisii	XM_003773130.1		NOD-1	Sus scrofa	AB187219.1
TLR2	Ochotona princeps	XM_004598470.1		NOD-1	Chiloscyllium griseum	3207963
TLR2	Gallus gallus	AB046119.2
TLR2	Epinephelus coioides	HM357230.1		Gene	Species	Accession No.		Gene	Species	Accession No.
TLR2	Cyprinus carpio	FJ858800.1		NOD2	Mustela putorius furo	XM_004744161.1		MDA5	Chrysemys picta bellii	XM_005290355.1
TLR2	Danio rerio	AY388399.1		NOD2	Ornithorhynchus anatinus	XM_001519888.1		MDA5	Gallus gallus	AB371640
TLR2	Takifugu rubripes	AC156432.1		NOD2	Equus caballus	XM_001915288.3		MDA5	Capra hircus	XM_005676042
TLR2	Ictalurus punctatus	HQ677714.1		NOD2	Sus scrofa	AB426547.1		MDA5	Bos tarus	XM_002685338
TLR2	Ctenopharyngodon idella	FJ542042.		NOD2	Canis lupus familiaris	XM_005617571.1		MDA5	Homo sapiens	BC111750.1
TLR2	Labeo rohita	HQ293022.1		NOD2	Bos taurus	NM_001002889.1		MDA5	Pongo abelii	XM_002812527
TLR2	Loxodonta africana	XM_003417524.1		NOD2	Tursiops truncatus	XM_004320838.1		MDA5	Canis lupus familiaries	XM_545493
TLR3	Homo sapiens	NM_003265.2		NOD2	Mus musculus	AAN57791.1		MDA5	Mus musculus	NM_027835
TLR3	Mus musculus	NM_126166.4		NOD2	Homo sapiens	XM_005256084.1		MDA5	Equus caballus	XM_001494330
TLR3	Sus scrofa	DQ266435.1		NOD2	Epinephelus coioides	JX220895.1		MDA5	Ictalurus punctatus	NM_001278812
TLR3	Bos taurus	NM_001008664.1		NOD2	Labeo rohita	JF923468		MDA5	Xenopus (Silurana) tropicalis	XM_002933274
TLR3	Tursiops truncatus	XM_004321214.1		NOD2	Danio rerio	XM_005169020.1		MDA5	Cyprinus carpio	HQ850439.1
TLR3	Ochotona princeps	XM_004578996.1		NOD2	Monodelphis domestica	XM_001371542.2		MDA5	Sus scrofa	NM_001100194.1
TLR3	Gallus gallus	NM_001011691.3		NOD2	Chiloscyllium griseum	3184971		MDA5	Ctenopharyngodon idella	FJ542045.2
TLR3	Takifugu rubripes	AC156436.1						MDA5	Danio rerio	XM_689032
TLR3	Danio rerio	NM_001013269.3						MDA5	Sarcophilus harrisii	XM_003763905.1
TLR3	Xenopus (Silurana) tropicalis	XM_002934402.2						MDA5	Chiloscyllium griseum	3209733
TLR4	Homo sapiens	U88880.1
TLR4	Bos taurus	NM_174198.6		Details on the accession numbers of the Urea Transporter sequences
TLR4	Sus scrofa	NM_001113039.1		used for the generation of phylogenetic tree
TLR4	Mus musculus	NM_021297.2
TLR4	Oryctolagus cuniculus	NM_001082732.2			Species name	acession ID
TLR4	Sarcophilus harrisii	XM_003757076.1			Opsanus beta	AAD53268.2
TLR4	Gallus gallus	NM_001030693.1			Leucoraja ocellata	AAL12243.1
TLR4	Chrysemys picta bellii	XM_005301387.1			Globicephala macrorhynchus	AAL12243.1
TLR4	Ctenopharyngodon idella	FJ542043.1			Trachemys scripta elegans	BAF76798.1
TLR5	Homo sapiens	NM_003268.5			Rhinella marina	BAE16706.1
TLR5	Mus musculus	NM_016928.2			Triakis scyllium	BAC75980.1
TLR5	Sus scrofa	NM_001123202.1			Rattus norvegicus	CAA67049.1
TLR5	Bos taurus	NM_001040501.1			Pelodiscus sinensis	AEY79422.1
TLR5	Oryctolagus cuniculus	HQ874605.1			Ovis aries	ACR78174.1
TLR5	Orcinus orca	XM_004271004.1			Alcolapia grahami	AAG49891.1
TLR5	Sarcophilus harrisii	XM_003767727.1			Bos taurus	AAW02793.1
TLR5	Gallus gallus	FJ915553.1			Homo sapiens	NP_009094.3
TLR5	Cyprinus carpio	KC347572.1			Mus musculus	NP_997534.2
TLR5	Takifugu rubripes	AC156437.1			Dasyatis sabina	AAM46683.2
TLR5	Xenopus laevis	NM_001094980.1			Anolis carolinensis	XP_003214562.1
TLR6	Homo sapiens	AB020807.1			Protopterus annectens	ACH85194.1
TLR6	Bos taurus	NM_001001159.1			Gallus gallus	XP_003642954.1
TLR6	Mus musculus	AB020808.1			Taeniopygia guttata	XP_002195499.1
TLR6	Sus scrofa	NM_213760.1			Rana pipiens	AFE48182.1
TLR6	Sarcophilus harrisii	XM_003773313.1			Squalus acanthias	AAF66072.1
TLR6	Tursiops truncatus	XM_004321019.1			Scyliorhinus canicula	AEH59797.1
TLR6	Ochotona princeps	XM_004579156.1			Callorhinchus milii	BAH58773.1
TLR6	Felis catus	XM_003985467.1			Gorilla gorilla	XP_004059409.1
TLR6	Canis lupus familiaris	XM_003434360.1			Felis catus	XP_003995214.1
TLR6	Maccaca mulatta	NM_001130430.1			Oryctolagus cuniculus	NP_001075809.1
TLR6	Saimiri boliviensis	XM_003927518.1			Cricetulus griseus	EGW04268.1
TLR7	Homo sapiens	NM_016562.3			Macaca mulatta	EHH29278.1
TLR7	Bos taurus	EF583900.1
TLR7	Sus scrofa	EF583901.1		Details on the accession numbers of the TLR3 sequences
TLR7	Mus musculus	NM_133211.3		used for the generation of phylogenetic tree
TLR7	Tursiops truncatus	XM_004317713.1		TLR type	Species	Accession ID		TLR type	Species	Accession ID
TLR7	Ochotona princeps	XM_004591690.1		TLR1	Bos tarus	NM_001046504		TLR4	Gallus gallus	NM_001030693.1
TLR7	Gallus gallus	FJ915600.1		TLR1	Homo sapiens	U88540.1		TLR5	Homo sapiens	NM_003268.5
TLR7	Xenopus (Silurana) tropicalis	NM_001127411.1		TLR1	Mus musculus	AY009154.1		TLR5	Mus musculus	NM_016928.2
TLR7	Oncorhynchus mykiss	GQ422119.1		TLR1	Tursiops truncatus	XM_004321018.1		TLR5	Bos taurus	NM_001040501.1
TLR7	Danio rerio	XM_003199261.2		TLR1	Gallus gallus	AB109401.1		TLR5	Sarcophilus harrisii	XM_003767727.1
TLR7	Chrysemys picta bellii	XM_005287773.1		TLR1	Danio rerio	NM_001130593.1		TLR5	Gallus gallus	FJ915553.1
TLR8	Homo sapiens	NM_138636.4		TLR2	Bos taurus	NM_174197.2		TLR5	Cyprinus carpio	KC347572.1
TLR8	Bos taurus	NM_001033937.1		TLR2	Mus musculus	NM_011905.3		TLR6	Homo sapiens	AB020807.1
TLR8	Sus scrofa	NM_214187.1		TLR2	Tursiops truncatus	XM_004330423.1		TLR6	Bos taurus	NM_001001159.1
TLR8	Mus musculus	NM_133212.2		TLR2	Gallus gallus	AB046119.2		TLR6	Mus musculus	AB020808.1
TLR8	Ochotona princeps	XM_004591551.1		TLR2	Danio rerio	AY388399.1		TLR6	Sus scrofa	NM_213760.1
TLR8	Tursiops truncatus	XM_004317714.1		TLR2	Homo sapiens	NM_003264.3		TLR6	Sarcophilus harrisii	XM_003773313.1
TLR8	Sarcophilus harrisii	XM_003765579.1		TLR3	Homo sapiens	NM_003265.2		TLR6	Tursiops truncatus	XM_004321019.1
TLR8	Salmo salar	FJ467615.1		TLR3	Mus musculus	NM_126166.4		TLR6	Ochotona princeps	XM_004579156.1
TLR9	Andrias davidianus	JN969980.1		TLR3	Sus scrofa	DQ266435.1		TLR7	Homo sapiens	NM_016562.3
TLR9	Homo sapiens	NM_017442.3		TLR3	Bos taurus	NM_001008664.1		TLR7	Bos taurus	EF583900.1
TLR9	Maccaca mulatta	NM_001130431.1		TLR3	Tursiops truncatus	XM_004321214.1		TLR7	Mus musculus	NM_133211.3
TLR9	Pan troglodytes	NM_001144866.1		TLR3	Ochotona princeps	XM_004578996.1		TLR7	Tursiops truncatus	XM_004317713.1
TLR9	Gorilla gorilla	AB445676.1		TLR3	Gallus gallus	NM_001011691.3		TLR7	Ochotona princeps	XM_004591690.1
TLR9	Pongo abelli	XM_002813679.2		TLR3	Takifugu rubripes	AC156436.1		TLR7	Gallus gallus	FJ915600.1
TLR9	Bos taurus	NM_183081.1		TLR3	Danio rerio	NM_001013269.3		TLR7	Danio rerio	XM_003199261.2
TLR9	Sus scrofa	NM_213958.1		TLR3	Xenopus (Silurana) tropicalis	XM_002934402.2		TLR8	Homo sapiens	NM_138636.4
TLR9	Tursiops truncatus	XM_004313247.1		TLR3	Canis lupus familiaris	XM_540020.2		TLR8	Bos taurus	NM_001033937.1
TLR9	Cervus nippon	HQ260632.1		TLR3	Felis catus	NM_001079829.1		TLR8	Mus musculus	NM_133212.2
TLR9	Ovis aries	AY859727.1		TLR3	Macaca mulatta	EU204934.1		TLR8	Ochotona princeps	XM_004591551.1
TLR9	Mus musculus	NM_031178.2		TLR3	Rattus norvegicus	NM_198791.1		TLR8	Tursiops truncatus	XM_004317714.1
TLR9	Rattus norvegicus	NM_198131.1		TLR3	Ictalurus punctatus	HQ677715.1		TLR8	Sarcophilus harrisii	XM_003765579.1
TLR9	Canis lupus familiaris	NM_001002998.1		TLR3	Epinephelus coioides	HQ857748.1		TLR8	Salmo salar	FJ467615.1
TLR9	Equus caballus	NM_001081790.1		TLR3	Labeo rohita	JN886779.1		TLR9	Homo sapiens	NM_017442.3
TLR9	Sarcophilus harrisii	XM_003762588.1		TLR3	Orcinus orca	XM_004277192		TLR9	Bos taurus	NM_183081.1
TLR9	Oryctolagus cuniculus	HM448400.1		TLR3	Anolis carolinensis	XM_003221602.1		TLR9	Tursiops truncatus	XM_004313247.1
TLR9	Paralichthys olivaceus	AB234023.1		TLR4	Homo sapiens	U88880.1		TLR9	Mus musculus	NM_031178.2
TLR9	Ictalurus punctatus	HQ677720.1		TLR4	Bos taurus	NM_174198.6		TLR9	Sarcophilus harrisii	XM_003762588.1
TLR9	Takifugu rubripes	AC156439.1		TLR4	Mus musculus	NM_021297.2		TLR9	Danio rerio	NM_001130594.1
TLR9	Danio rerio	NM_001130594.1		TLR4	Tursiops truncatus	NM_001281808.1
TLR9	Cyprinus carpio	GU809229.1
TLR9	Paralichthys olivaceus	AB234023.1
TLR9	Sparus aurata	AY751797.1
