# Supplementary material for: Transcriptome Profiling Reveals Higher Vertebrate Orthologous of Intra-Cytoplasmic Pattern Recognition Receptors in Grey Bamboo Shark
Source: PLoS One. 2014 Jun 23;9(6):e100018. doi: 10.1371/journal.pone.0100018 (PMC4067322; doi:10.1371/journal.pone.0100018)
Supplement: Table S3 — Transcripts IDs of Chiloscyllium griseum with >300 bp long selected and used for the analysis in this study. (XLSX) [file pone.0100018.s008.xlsx]

## Sheet: Table S3
	Transcripts IDs with >300 bp long used for the analysis
TranscriptID	Length(bp)	Total_A	Total_C	Total_G	Total_T	GC_Content	Spleen	Kidney	Spleen_FPKM	Kidney_FPKM
3212109	16974	4595	3855	3714	4810	44.5917	3843	4269	2.39484	2.68243
3212107	15851	4545	3555	3682	4069	45.6564	5148	5182	3.43536	3.4868
3212105	15036	4001	3670	3089	4276	44.9521	2850	3344	2.00495	2.37203
3212103	14762	4086	3249	2789	4638	40.9023	66	2848	0.0472922	2.05769
3212101	14655	3947	3697	2939	4072	45.2815	4212	2315	3.04014	1.68481
3212097	13852	4376	2675	3022	3779	41.1276	1869	349	1.42721	0.268719
3212095	13769	4905	2547	3402	2915	43.2058	2311	1517	1.77537	1.17508
3212093	13573	4595	2408	2573	3997	36.6979	91	7030	0.0709179	5.52415
3212091	13400	3761	2933	3067	3639	44.7761	2567	3171	2.02634	2.52393
3212089	13357	4163	2555	2866	3773	40.5855	1835	3603	1.45317	2.87701
3212087	13168	3935	2756	2877	3600	42.7779	1410	436	1.13263	0.353145
3212085	12823	2363	3897	3155	3408	54.9949	2286	2142	1.88572	1.78162
3212083	12344	3554	2533	2908	3349	44.0781	4829	3650	4.13801	3.15372
3212081	11904	3913	2045	1898	4048	33.1233	281	1188	0.249692	1.06441
3212079	11835	3542	2318	2835	3140	43.5403	5884	5426	5.2589	4.88987
3212077	11785	3381	2047	2243	4114	36.4022	2319	1296	2.08143	1.1729
3212075	11629	3597	2458	2512	3062	42.738	3954	3783	3.59654	3.4696
3212073	11619	2934	2907	3013	2765	50.951	938	2974	0.853934	2.72997
3212071	11536	3187	2442	2313	3594	41.2188	4865	3197	4.46085	2.95579
3212069	11456	3650	2146	2266	3394	38.5126	1281	1503	1.18279	1.3993
3212067	11440	3258	2455	2418	3309	42.5962	8509	7138	7.86761	6.65482
3212065	11342	3380	2186	2444	3332	40.8217	2688	2631	2.50686	2.4741
3212063	11181	3694	2103	2249	3135	38.9232	5549	3088	5.24958	2.94566
3212061	11127	3702	1999	2290	3136	38.5459	1483	3105	1.40979	2.97625
3212059	11124	2886	2576	2287	3375	43.7163	2997	3098	2.84981	2.97034
3212057	11091	3196	2258	2489	3148	42.8005	6122	6436	5.83866	6.18915
3212055	10867	2903	2510	2440	3014	45.5507	788	2689	0.76702	2.63917
3212053	10855	2632	2320	2375	3528	43.252	5170	3703	5.03792	3.63839
3212051	10769	2897	2383	2457	3032	44.9438	3816	3422	3.74821	3.38915
3212049	10739	2966	2515	2364	2894	45.4325	2196	1857	2.16301	1.84431
3212047	10674	3134	2294	2028	3218	40.4909	1591	2918	1.57664	2.91571
3212045	10544	3100	2080	2116	3248	39.7951	6174	3331	6.19372	3.36942
3212043	10388	3215	1957	1881	3335	36.9465	1746	1723	1.77788	1.76905
3212041	10121	2854	2301	2316	2650	45.618	965	3219	1.00854	3.39222
3212039	9890	2972	2107	2319	2492	44.7523	3097	4517	3.31234	4.87124
3212035	9698	2973	1775	1844	3106	37.317	4586	5088	5.00198	5.59565
3212033	9696	3182	1994	1778	2742	38.9026	2312	2030	2.52224	2.233
3212031	9629	3034	1691	1972	2932	38.0413	1712	1658	1.88067	1.83649
3212029	9621	2599	2286	2104	2632	45.6294	2064	3797	2.26924	4.20927
3212025	9593	2898	1951	2079	2665	42.0098	3269	1796	3.60455	1.99682
3212027	9593	3007	1590	1796	3200	35.2966	2042	2672	2.2516	2.97076
3212023	9586	2891	1826	2162	2707	41.6023	3870	1186	4.27035	1.31957
3212021	9556	3530	1721	2214	2091	41.1783	858	2150	0.949733	2.39965
3212017	9536	2585	2056	2020	2875	42.7433	3103	2934	3.44196	3.28156
3212019	9536	2614	2128	1845	2949	41.6632	953	1042	1.0571	1.16543
3212015	9535	3003	1799	2172	2561	41.6466	1858	1569	2.06118	1.75504
3212013	9515	2899	1631	1772	3213	35.7646	5717	670	6.3555	0.751021
3212011	9404	2748	2020	1848	2788	41.1314	2142	1581	2.40934	1.7931
3212009	9400	3180	1892	1988	2340	41.2766	1230	2254	1.3841	2.55748
3212007	9328	2601	2226	1928	2573	44.5326	2335	4923	2.64782	5.62895
3212005	9293	2062	2332	1814	3085	44.6142	562	1180	0.639692	1.35429
3212003	9199	2554	2148	1974	2523	44.8092	3649	2847	4.19589	3.3009
3212001	9162	2758	1640	1824	2940	37.8083	733	2094	0.846261	2.43766
3211995	9086	2653	1746	2095	2592	42.2738	1201	1141	1.39817	1.33936
3211993	9020	3065	1684	1824	2447	38.8914	1106	857	1.297	1.01335
3211991	8991	2826	1759	1533	2873	36.6144	1893	1617	2.22707	1.91817
3211989	8987	2470	1909	1738	2870	40.5808	4596	816	5.40948	0.968415
3211987	8982	2414	2219	2217	2132	49.3877	166	1225	0.19549	1.45462
3211985	8859	2919	1904	2471	1565	49.3848	2514	2758	3.00173	3.32044
3211983	8823	1916	2116	2040	2751	47.1042	1256	2233	1.50579	2.69934
3211981	8817	3119	1553	1764	2381	37.6205	3394	3042	4.07175	3.6798
3211979	8799	2348	1823	1768	2860	40.8115	3091	2840	3.71583	3.44248
3211977	8797	2685	1764	2022	2326	43.0374	3942	640	4.73994	0.775946
3211975	8790	2459	1947	2102	2282	46.0637	2702	2596	3.25152	3.14994
3211973	8789	2702	1896	1963	2228	43.9072	212	1099	0.255145	1.33366
3211971	8765	2652	1912	1793	2408	42.2704	2205	1710	2.66101	2.0808
3211969	8729	2945	1664	1986	2134	41.8146	839	656	1.01669	0.80154
3211967	8678	2478	1890	1741	2569	41.8414	1210	6703	1.47488	8.23826
3211965	8667	2744	1792	1815	2316	41.6176	2138	2140	2.60933	2.63349
3211963	8662	2630	1616	1791	2625	39.3327	1086	288	1.32618	0.354618
3211961	8625	2474	1861	1698	2592	41.2638	327	1924	0.401032	2.37921
3211959	8622	2996	1482	1480	2664	34.354	2805	1808	3.44124	2.23654
3211957	8611	2544	1758	2000	2309	43.6419	418	1059	0.513468	1.31168
3211955	8583	2139	2197	2107	2140	50.1456	2129	734	2.62378	0.912101
3211953	8547	2407	1928	1744	2468	42.9624	1105	2055	1.36754	2.56439
3211951	8533	1696	2423	2252	2162	54.7873	2783	628	3.44986	0.784953
3211949	8531	2677	1765	1622	2467	39.7023	2195	1772	2.7216	2.21539
3211947	8525	2405	1807	1915	2398	43.6598	2213	319	2.74585	0.3991
3211945	8523	2174	1989	1707	2653	43.365	3582	2196	4.44553	2.74806
3211943	8511	2685	1686	1748	2392	40.3478	596	2612	0.740723	3.27325
3211941	8499	2688	1606	1538	2667	36.9926	2413	2554	3.00317	3.20508
3211939	8478	2498	1863	1957	2160	45.0578	834	1390	1.04055	1.74867
3211937	8459	2651	1825	1794	2189	42.7828	663	1520	0.829058	1.91651
3211935	8435	2399	1756	1871	2409	42.9994	377	811	0.472766	1.02547
3211933	8403	2449	1808	1602	2544	40.5807	2244	2234	2.82474	2.83553
3211931	8394	2483	1516	1804	2591	39.5521	3668	9800	4.62222	12.4521
3211929	8390	2392	1734	1841	2423	42.6103	1597	2589	2.01342	3.29121
3211927	8359	2794	1549	1744	2272	39.3947	1442	208	1.82474	0.265396
3211925	8342	2047	1814	1526	2955	40.0384	8383	3502	10.6297	4.47746
3211923	8338	2191	1969	1857	2321	45.8863	755	1420	0.957801	1.8164
3211921	8326	1849	1901	2121	2455	48.3065	900	168	1.1434	0.215208
3211919	8319	1959	2048	1783	2529	46.0512	12602	5100	16.0236	6.5386
3211917	8313	2120	2074	1863	2256	47.3596	4965	5832	6.3176	7.48248
3211915	8301	2288	1780	1619	2614	40.9469	519	2126	0.661344	2.73161
3211911	8271	2396	1672	1592	2611	39.4632	4574	4258	5.84963	5.49077
3211913	8271	2061	2040	1878	2292	47.3703	2633	5286	3.36731	6.8164
3211909	8269	2471	1930	1789	2079	44.9752	2561	1929	3.27602	2.48808
3211905	8236	2310	1638	1560	2728	38.8295	295	1721	0.378875	2.22869
3211903	8193	2332	1774	1933	2154	45.2459	2612	2521	3.37226	3.28183
3211901	8187	2398	1636	1566	2587	39.1108	4078	3996	5.26881	5.20579
3211899	8174	2816	1514	1757	2087	40.0171	1461	34	1.89063	0.044364
3211897	8166	2433	2004	1685	2044	45.1751	2176	5030	2.81864	6.56969
3211893	8125	2724	1438	1499	2464	36.1477	1416	326	1.84345	0.427937
3211891	8085	2938	1376	1632	2139	37.2047	1354	1517	1.77145	2.0012
3211889	8083	2125	1729	1578	2651	40.913	1510	968	1.97604	1.27729
3211887	8063	2820	1519	1624	2100	38.9805	1400	2116	1.83663	2.79901
3211885	8041	2391	1568	1816	2266	42.0843	2439	1787	3.20843	2.37028
3211883	8006	2391	1721	1557	2337	40.9443	1771	3153	2.33988	4.20044
3211881	8004	2297	1781	1808	2118	44.8401	2009	2608	2.65499	3.47525
3211879	7985	2472	1408	1597	2508	37.6331	3907	666	5.17558	0.889581
3211877	7960	2411	1533	1501	2515	38.1156	881	745	1.17072	0.998227
3211875	7936	2192	1822	1671	2251	44.0146	2390	2550	3.18557	3.42708
3211871	7925	2556	1309	1647	2413	37.2997	5607	4588	7.48379	6.17462
3211869	7845	2432	1529	1808	2076	42.5366	2678	2210	3.61084	3.00459
3211865	7833	2412	1413	1443	2565	36.4611	2710	1307	3.65958	1.77965
3211863	7810	2376	1538	1724	2172	41.767	1116	1396	1.51148	1.90643
3211861	7806	2231	1526	1716	2333	41.5322	1395	1479	1.89032	2.02081
3211859	7800	2102	1707	1478	2513	40.8333	2583	2846	3.50284	3.89158
3211857	7775	2441	1407	1565	2362	38.2251	2657	1993	3.61478	2.73396
3211855	7772	2000	1929	2048	1795	51.1709	1676	1071	2.28103	1.46975
3211853	7770	2136	1482	1494	2658	38.3012	1786	1608	2.43137	2.20725
3211851	7762	2060	1810	1661	2231	44.7179	1155	881	1.57398	1.21057
3211849	7737	2172	1643	1587	2335	41.7474	1460	1458	1.99605	2.00988
3211847	7721	2249	1575	1614	2283	41.3029	1190	1413	1.63029	1.95189
3211845	7720	2581	1422	1864	1853	42.5648	1502	3519	2.05799	4.8617
3211843	7716	2208	1492	1810	2206	42.7942	24	6665	0.032901	9.21285
3211841	7681	1986	1815	1489	2391	43.0152	2360	1063	3.25001	1.47605
3211839	7669	2261	1617	1737	2054	43.7345	1461	2785	2.01512	3.87322
3211837	7656	1992	1602	1299	2763	37.8918	269	720	0.371656	1.00304
3211835	7654	2111	1816	1470	2257	42.9318	5	742	0.0069099	1.03395
3211833	7645	2619	1548	1560	1918	40.654	914	1189	1.26462	1.65879
3211831	7639	2425	1532	1339	2343	37.5835	3758	3014	5.20368	4.20816
3211829	7630	2136	1607	1470	2417	40.3277	414	5067	0.57394	7.08292
3211825	7586	2093	1682	1511	2300	42.0907	749	871	1.04438	1.22459
3211823	7566	2322	1430	1574	2240	39.7039	3041	663	4.25148	0.934616
3211821	7566	1914	1873	1612	2167	46.0613	1550	1014	2.16698	1.42941
3211817	7537	2248	1667	1514	2108	42.2051	1549	2057	2.17392	2.91086
3211815	7509	2443	1405	1547	2114	39.3128	2103	2541	2.96243	3.60918
3211813	7508	1600	1847	2155	1906	53.3031	1961	3113	2.76276	4.42222
3211809	7507	1944	1895	1705	1963	47.9552	8654	107	12.1939	0.152021
3211811	7507	2362	1427	1557	2161	39.7496	2747	11904	3.87064	16.9127
3211807	7506	2172	1261	1426	2647	35.798	1325	960	1.86723	1.36411
3211805	7500	1736	1665	1770	2329	45.8	539	2582	0.760183	3.67182
3211801	7480	1756	1669	1255	2800	39.0909	1413	8812	1.99816	12.5649
3211799	7478	2051	1882	2015	1530	52.1129	1512	1503	2.13873	2.14368
3211797	7477	2501	1584	1909	1483	46.7166	7811	13777	11.0502	19.6523
3211795	7467	2220	1376	1429	2442	37.5653	0	3626	0	5.17926
3211793	7466	2294	1527	1614	2031	42.0707	331	1799	0.468954	2.56998
3211791	7465	2409	1457	1436	2163	38.7542	2820	1913	3.99585	2.7332
3211789	7431	2231	1434	1474	2292	39.1334	1382	5943	1.96721	8.52991
3211787	7428	2213	1478	1618	2119	41.6801	2187	2666	3.11435	3.82802
3211785	7392	2129	1423	1437	2403	38.6905	674	3889	0.964469	5.61128
3211783	7390	2114	1589	1324	2363	39.4181	2048	3169	2.93141	4.57366
3211781	7377	2310	1292	1517	2258	38.0778	1091	847	1.56436	1.22459
3211779	7359	2609	1280	1225	2245	34.04	1345	1697	1.93328	2.45951
3211777	7331	2086	1552	1452	2241	40.9767	1379	1414	1.98972	2.05718
3211775	7327	2218	1509	1655	1945	43.1827	1019	1961	1.47109	2.85455
3211771	7322	2028	1782	1535	1977	45.3018	2266	1564	3.27356	2.27821
3211769	7314	1840	1703	1510	2261	43.9295	3481	96	5.0343	0.139992
3211767	7302	2196	1593	1784	1729	46.2476	46	2108	0.0666356	3.07904
3211765	7301	2347	1239	1426	2289	36.5018	1599	2654	2.31663	3.87708
3211763	7281	1997	1564	1370	2350	40.2967	3075	1955	4.46729	2.86379
3211761	7274	2058	1416	1594	2206	41.3803	1167	1172	1.69702	1.71846
3211759	7265	2153	1478	1301	2333	38.2519	5028	2876	7.32066	4.2222
3211757	7262	1270	2275	2353	1364	63.729	3563	3705	5.18979	5.44149
3211755	7260	2331	1296	1301	2332	35.7713	1787	1882	2.60362	2.76483
3211753	7258	2015	1571	1480	2192	42.0364	629	1154	0.916693	1.6958
3211751	7256	2049	1582	1362	2263	40.5733	2655	3621	3.87042	5.32252
3211749	7249	2290	1457	1875	1627	45.965	4490	3405	6.55177	5.00985
3211747	7248	1685	1789	1555	2219	46.1369	2419	2896	3.53027	4.26154
3211745	7243	2260	1363	1425	2195	38.4923	2106	2030	3.0756	2.98926
3211743	7240	2282	1359	1310	2289	36.8646	4608	3170	6.73231	4.66989
3211741	7224	2065	1439	1354	2366	38.6628	931	1847	1.36321	2.72694
3211739	7219	2021	1654	1784	1760	47.6243	1141	305	1.67186	0.450618
3211737	7215	2051	1752	1739	1673	48.3853	2056	1886	3.01424	2.78799
3211735	7213	2191	1469	1272	2281	38.0008	2506	609	3.67498	0.900507
3211733	7212	2370	1466	1450	1926	40.4326	440	5060	0.645338	7.48309
3211731	7203	2372	1289	1309	2233	36.0683	1325	12457	1.94578	18.4453
3211729	7198	2101	1619	1539	1939	43.8733	1129	1648	1.6591	2.44192
3211727	7197	2212	1416	1541	2028	41.0866	1762	46	2.58967	0.0681698
3211725	7189	2438	1350	1228	2173	35.8603	3752	5635	5.52058	8.3601
3211723	7182	1976	1581	1709	1916	45.809	1983	1758	2.92057	2.61071
3211719	7180	2327	1177	1308	2368	34.61	800	1059	1.17857	1.5731
3211717	7180	1789	1612	1702	2077	46.156	7	890	0.0103125	1.32206
3211715	7178	1929	1725	1818	1706	49.3592	2262	2945	3.33334	4.3759
3211713	7171	1983	1550	1411	2227	41.2913	463	1751	0.682954	2.60431
3211711	7168	2334	1400	1562	1872	41.3225	1980	2870	2.92185	4.27041
3211709	7165	1573	1731	1419	2442	43.9637	1692	1668	2.4979	2.48294
3211707	7153	1909	1605	1298	2341	40.5844	4120	3126	6.09255	4.66108
3211705	7149	1998	1530	1452	2169	41.7121	228	3881	0.337349	5.79008
3211703	7131	2201	1466	1319	2145	39.0548	1274	1684	1.88977	2.51871
3211701	7128	1800	1770	1568	1990	46.8294	3061	1105	4.54241	1.65341
3211699	7125	1922	1707	1852	1644	49.9509	212	2216	0.314732	3.31719
3211697	7124	2158	1352	1545	2069	40.6654	3164	2868	4.69789	4.29379
3211695	7123	2029	1427	1375	2292	39.3374	1194	1876	1.77309	2.80903
3211693	7116	2016	1385	1312	2403	37.9005	1361	385	2.02308	0.577046
3211691	7114	2253	1319	1444	2098	38.8389	616	1015	0.915919	1.52173
3211689	7112	1753	1671	1601	2087	46.0067	1271	158	1.89036	0.236947
3211687	7103	2072	1417	1547	2067	41.7288	5000	4797	7.44592	7.20301
3211683	7090	2309	1343	1392	2046	38.5755	2220	1413	3.31205	2.1256
3211685	7090	2310	1369	1202	2209	36.2623	1726	1633	2.57505	2.45655
3211681	7084	1918	1612	1344	2210	41.7278	2219	4822	3.31336	7.25997
3211679	7077	2391	1425	1519	1742	41.5995	1328	2393	1.9849	3.60645
3211677	7055	1789	1615	1605	2046	45.6414	6841	4593	10.2568	6.94361
3211675	7043	2114	1532	1314	2083	40.4089	1304	965	1.95844	1.46135
3211673	7040	2282	1319	1263	2176	36.6761	2558	825	3.84342	1.24988
3211669	7026	2076	1401	1258	2291	37.8451	749	1931	1.12762	2.9313
3211667	7014	2134	1277	1476	2127	39.2501	3515	3815	5.3009	5.80116
3211665	7012	1940	1486	1494	2092	42.4986	2100	3056	3.16787	4.64833
3211663	7005	2068	1478	1575	1884	43.5832	1516	767	2.28919	1.16781
3211661	6998	1820	1563	1594	2021	45.1129	2839	2792	4.29123	4.25527
3211659	6979	1857	1613	1557	1952	45.422	66	1235	0.100033	1.88738
3211657	6951	2183	1363	1436	1969	40.2676	580	1158	0.882615	1.77684
3211655	6945	1879	1539	1456	2071	43.1246	1382	1630	2.10487	2.50323
3211653	6942	1992	1289	1420	2241	39.0233	2250	3104	3.42837	4.76895
3211651	6940	2528	1296	1225	1891	36.3256	714	1553	1.08825	2.3867
3211649	6934	2148	1516	1613	1657	45.1255	838	750	1.27835	1.15362
3211647	6930	2002	1565	1508	1855	44.3434	1508	2079	2.30175	3.19968
3211645	6929	2086	1371	1327	2145	38.9378	842	282	1.28538	0.434075
3211643	6928	2084	1367	1255	2222	37.8464	2279	3107	3.47958	4.78321
3211641	6925	2051	1368	1341	2165	39.1191	829	784	1.26627	1.20749
3211639	6913	2112	1366	1339	2096	39.1292	942	1656	1.44137	2.55493
3211635	6910	1752	1606	1585	1967	46.1795	563	1075	0.861828	1.65927
3211633	6904	2097	1250	1400	2157	38.3835	1026	294	1.57194	0.454185
3211631	6902	2062	1529	1348	1963	41.6836	1040	851	1.59385	1.31504
3211629	6901	1767	1547	1628	1959	46.0078	255	2450	0.390858	3.78652
3211627	6895	2062	1398	1487	1948	41.8419	2184	1027	3.35049	1.58863
3211625	6891	1947	1389	1480	2075	41.634	2295	4116	3.52282	6.37058
3211623	6881	1937	1549	1302	2093	41.4329	1913	2636	2.94072	4.08583
3211621	6879	2278	1376	1627	1598	43.6546	3314	2517	5.09586	3.90251
3211619	6859	1874	1534	1419	2032	43.0529	476	3740	0.734068	5.81563
3211617	6850	1834	1523	1360	2133	42.0876	627	1038	0.968205	1.61619
3211615	6846	2094	1258	1397	2097	38.7818	728	1869	1.12482	2.91178
3211613	6839	1994	1254	1308	2283	37.4616	999	770	1.54512	1.20084
3211611	6836	1978	1396	1419	2043	41.1791	799	149	1.23633	0.232472
3211609	6810	2213	1402	1254	1941	39.0015	2174	2317	3.37678	3.62882
3211607	6806	1914	1378	1581	1933	43.4763	3674	1332	5.71002	2.08736
3211605	6806	1902	1497	1686	1721	46.7676	1159	4700	1.80128	7.36532
3211603	6804	2062	1336	1282	2124	38.4774	1511	1235	2.34904	1.93593
3211601	6794	2087	1269	1482	1956	40.4916	104	798	0.161919	1.25275
3211599	6772	2083	1273	1586	1830	42.218	2237	3843	3.49413	6.05256
3211597	6772	1875	1440	1315	2142	40.6822	1119	2504	1.74785	3.9437
3211595	6757	1993	1163	1190	2411	34.8231	1664	903	2.60489	1.42534
3211593	6755	1665	1688	1659	1743	49.5485	310	3378	0.48543	5.3336
3211589	6753	1819	1291	1509	2134	41.4631	815	1593	1.27659	2.51597
3211591	6753	1718	1522	1668	1845	47.2383	108	641	0.169168	1.01239
3211585	6752	1925	1483	1285	2059	40.9953	984	822	1.54153	1.29845
3211583	6751	2741	1107	1502	1401	38.6461	1402	2650	2.1967	4.18662
3211581	6731	1964	1440	1225	2102	39.5929	1503	2571	2.36195	4.07388
3211579	6712	2091	1211	1448	1962	39.6156	5528	5038	8.71177	8.00557
3211577	6705	2229	1281	1176	2019	36.6443	3175	73957	5.00882	117.643
3211575	6703	2015	1298	1406	1984	40.3401	153	1960	0.241442	3.11869
3211573	6699	1768	1289	1451	2191	40.9016	7	852	0.011053	1.35649
3211571	6698	2150	1330	1307	1911	39.37	758	1124	1.19706	1.78981
3211569	6695	1609	1457	1184	2445	39.4473	1412	371	2.23087	0.59103
3211567	6687	2092	1022	1233	2340	33.7221	1580	1453	2.49929	2.3175
3211565	6677	2215	1210	1292	1960	37.4719	1704	1920	2.69947	3.06694
3211563	6664	2060	1330	1347	1927	40.1711	1459	1354	2.31585	2.16705
3211561	6658	1569	1737	1991	1361	55.9928	2320	2179	3.68582	3.49059
3211559	6657	2152	1296	1205	2004	37.5695	1795	1280	2.85218	2.05077
3211557	6654	1849	1459	1313	2033	41.6592	829	1353	1.31784	2.16871
3211553	6638	2216	1289	1258	1875	38.37	3949	2355	6.29275	3.7839
3211555	6638	1809	1412	1192	2225	39.2287	388	2524	0.61828	4.05544
3211551	6633	2245	1202	1316	1870	37.9617	801	1157	1.27736	1.86041
3211549	6623	1964	1454	1415	1790	43.3187	3398	8025	5.42699	12.9234
3211547	6622	1994	1320	1268	2040	39.0818	8043	89	12.8475	0.143346
3211545	6605	1798	1268	1366	2173	39.8789	5786	6011	9.26608	9.70644
3211541	6587	2145	1291	1305	1846	39.411	382	2176	0.613432	3.52336
3211539	6584	1980	1493	1519	1592	45.7473	3170	3501	5.09284	5.67137
3211537	6582	1582	1561	1303	2136	43.5126	105	1635	0.168741	2.64939
3211533	6575	1839	1428	1332	1976	41.9772	3626	3335	5.83341	5.40986
3211531	6574	1827	1612	1283	1852	44.0371	1541	1532	2.4795	2.48551
3211529	6554	1956	1244	1473	1881	41.4556	2325	2127	3.75238	3.46136
3211527	6553	2176	1348	1097	1932	37.3112	2616	1944	4.22268	3.16404
3211525	6552	2046	1438	1608	1460	46.4896	1743	1491	2.81393	2.42711
3211523	6539	1961	1314	1237	2027	39.0121	918	736	1.48498	1.20047
3211521	6536	1762	1516	1382	1876	44.339	1656	1095	2.68002	1.78685
3211517	6521	1985	1089	1082	2365	33.2924	844	17747	1.36905	29.0266
3211513	6519	2053	1304	1211	1951	38.5795	2110	2500	3.42367	4.0902
3211511	6519	1129	1967	1558	1865	54.0727	172	790	0.279086	1.2925
3211509	6508	2001	1210	1223	2074	37.3848	1168	1669	1.89839	2.73524
3211507	6503	1815	1257	1420	2011	41.1656	6016	5627	9.78553	9.22888
3211505	6499	1900	1276	1326	1997	40.0369	485	1634	0.789379	2.68158
3211503	6495	2070	1237	1336	1852	39.6151	1898	1947	3.09106	3.19722
3211499	6493	2046	1367	1157	1923	38.8726	2263	1562	3.68663	2.56579
3211497	6492	1701	1415	1391	1985	43.2224	993	1263	1.61794	2.07497
3211495	6488	1741	1275	1234	2238	38.6714	2742	2496	4.47041	4.10317
3211493	6485	1619	1554	1458	1854	46.4456	783	319	1.27715	0.524646
3211491	6483	2018	1343	1400	1722	42.3107	1208	473	1.97098	0.778164
3211489	6482	2003	1349	1404	1726	42.4715	1485	1259	2.4233	2.07158
3211487	6481	1677	1400	1258	2146	41.0122	9330	10962	15.2275	18.0399
3211485	6476	2173	1074	1302	1927	36.6893	2731	1202	4.46072	1.97963
3211483	6472	1874	1254	1103	2241	36.4184	4718	2991	7.71098	4.92906
3211479	6465	1648	1230	1148	2439	36.7827	3039	481	4.97225	0.793528
3211481	6465	1937	1348	1516	1664	44.3001	637	108	1.04222	0.178173
3211477	6463	2058	1301	1094	2010	37.0571	1181	3088	1.93289	5.096
3211475	6462	1648	1459	1476	1879	45.4194	7	865	0.0114583	1.42769
3211473	6454	1945	1266	1296	1947	39.6963	2163	2714	3.54501	4.48505
3211471	6450	2052	1304	1417	1677	42.186	1547	1584	2.537	2.61928
3211469	6439	1583	1449	1599	1808	47.3365	3315	3362	5.44572	5.56885
3211465	6437	1561	1666	1449	1761	48.3921	2145	1729	3.5248	2.86482
3211467	6437	2218	1207	1108	1904	35.964	733	782	1.20451	1.29571
3211463	6429	1450	1324	1061	2594	37.0975	455	1194	0.748615	1.98083
3211461	6416	1603	1659	1296	1858	46.0567	1829	1548	3.01536	2.57331
3211459	6410	1883	1335	1248	1944	40.2964	2435	2632	4.0182	4.37939
3211457	6403	1904	1361	1295	1843	41.4806	1074	2951	1.77424	4.91554
3211453	6398	1855	1478	1584	1481	47.8587	515	3776	0.851439	6.29468
3211451	6389	2102	1190	1087	2010	35.6394	3401	2301	5.63072	3.84122
3211449	6382	1975	1278	1174	1955	38.4206	1773	1175	2.93861	1.96366
3211445	6372	1929	1236	1226	1981	38.6378	1450	1387	2.40704	2.3216
3211447	6372	2210	1096	1362	1704	38.575	681	76	1.13048	0.127211
3211443	6371	1744	1332	1238	2057	40.339	702	1792	1.16552	2.99997
3211441	6367	1894	1269	1351	1853	41.1497	1493	1845	2.48036	3.09063
3211439	6364	2001	1120	1411	1832	39.7706	4590	3388	7.62909	5.67805
3211437	6351	1827	1271	1130	2123	37.8051	2072	2334	3.45095	3.91963
3211435	6348	1695	1398	1040	2215	38.4058	4377	2704	7.2934	4.54314
3211431	6339	2123	1263	1027	1926	36.1256	3958	5472	6.60458	9.20685
3211429	6334	1864	1271	1301	1898	40.6063	1980	1514	3.30657	2.54938
3211427	6330	2026	1290	1351	1663	41.722	1611	2070	2.69204	3.48781
3211423	6321	1464	1554	1681	1622	51.1786	1448	1599	2.42311	2.69804
3211421	6312	1802	1457	1443	1610	45.9442	57	605	0.0955209	1.02229
3211419	6308	1842	1432	1594	1440	47.9708	11764	3695	19.7267	6.24754
3211413	6300	2183	1115	1318	1684	38.619	127	635	0.213233	1.07503
3211411	6283	1838	1350	1553	1542	46.204	2361	4652	3.97484	7.89694
3211409	6281	1899	1205	1386	1791	41.2514	6	766	0.0101045	1.30073
3211405	6273	1701	1415	1521	1636	46.8038	2109	4881	3.55625	8.29888
3211403	6262	1572	1452	1387	1851	45.337	1379	1340	2.32939	2.28233
3211401	6259	2114	1170	1016	1959	34.9257	898	2113	1.51762	3.60065
3211399	6259	1917	1255	1404	1683	42.4828	867	2614	1.46523	4.45437
3211397	6257	1606	1527	1723	1401	51.9418	756	641	1.27804	1.09264
3211395	6255	1883	1187	1445	1740	42.0783	2617	3957	4.42555	6.74722
3211393	6247	1890	1276	1259	1822	40.5795	1443	1618	2.44335	2.76244
3211391	6243	1815	1346	1205	1877	40.8618	1353	3277	2.29242	5.59847
3211389	6238	1973	1196	1478	1591	42.8663	4556	4009	7.72554	6.85451
3211385	6223	1793	1214	1145	2071	37.9078	1268	1826	2.15531	3.12959
3211383	6213	2212	1072	1249	1680	37.3572	1678	1828	2.85681	3.13806
3211381	6210	2146	1272	1088	1704	38.0032	13318	16172	22.6849	27.7753
3211379	6209	1768	1327	1183	1931	40.4252	29	3248	0.0494045	5.57931
3211377	6206	1790	1089	1247	2080	37.641	2945	1442	5.01954	2.47822
3211373	6205	1922	1212	1302	1769	40.5157	1017	1500	1.73368	2.57831
3211375	6205	1841	1212	1211	1941	39.0492	51	1905	0.0869398	3.27446
3211371	6195	1858	1288	1297	1752	41.7272	930	1055	1.58793	1.81634
3211369	6193	1881	1088	1284	1940	38.3013	29893	86014	51.0574	148.134
3211367	6183	2024	1109	1334	1716	39.5116	786	420	1.34466	0.724496
3211365	6174	2243	1055	984	1892	33.0256	1232	1796	2.11074	3.1026
3211363	6164	1919	1167	1306	1772	40.1201	3679	1076	6.31332	1.86181
3211361	6160	1738	1387	1148	1887	41.1526	2783	2644	4.77884	4.5779
3211359	6159	1815	1363	1205	1776	41.6951	1094	1162	1.87887	2.01225
3211357	6156	1830	1328	1189	1809	40.8869	2383	4534	4.09464	7.85541
3211355	6154	2021	1163	1202	1768	38.4303	419	648	0.72019	1.12306
3211353	6142	1898	1128	1160	1956	37.2517	637	930	1.09703	1.61495
3211351	6141	2040	1234	1314	1553	41.4916	1830	1831	3.15212	3.18006
3211349	6141	1469	1453	1321	1898	45.1718	920	785	1.58467	1.36338
3211347	6140	1628	1309	1060	2143	38.5831	26	1012	0.0447915	1.75792
3211345	6133	1741	1398	1353	1641	44.8557	1241	1214	2.14037	2.11121
3211343	6131	1792	1296	1171	1872	40.2381	958	1516	1.65282	2.63727
3211341	6123	1931	1187	1130	1875	37.8409	2034	2169	3.5138	3.77817
3211339	6115	1866	1321	1354	1574	43.7449	4721	390	8.16635	0.680227
3211337	6110	2043	1140	1248	1679	39.0835	3907	4811	6.76383	8.39808
3211333	6106	1763	1324	1520	1499	46.5771	5630	4567	9.75308	7.97738
3211331	6100	1838	1130	1354	1778	40.7213	1685	1528	2.92187	2.67165
3211327	6087	1635	1455	1293	1704	45.1454	1907	2071	3.31389	3.6288
3211325	6082	1854	1022	1159	2047	35.8599	2279	4940	3.96359	8.66296
3211323	6080	1933	1098	1140	1909	36.8092	943	1456	1.64058	2.55413
3211319	6075	1713	1347	1164	1851	41.3333	1229	1428	2.13991	2.50708
3211321	6075	1658	1376	1252	1789	43.2593	936	618	1.62975	1.085
3211317	6073	1807	1284	1186	1796	40.6718	7	2460	0.0121923	4.32034
3211315	6067	1561	1289	1164	2053	40.4318	884	1011	1.54123	1.77731
3211313	6064	1811	1126	1174	1953	37.9288	1583	1453	2.76129	2.5556
3211311	6063	1699	1414	1332	1618	45.2911	189	2491	0.329735	4.382
3211309	6062	1840	1263	1460	1499	44.9192	3071	4080	5.35864	7.17844
3211307	6054	1990	1111	1052	1901	35.7284	2020	5228	3.52939	9.21041
3211305	6046	2083	1022	1306	1635	38.5048	2217	10357	3.87872	18.2706
3211301	6041	2091	1044	1048	1858	34.63	3740	2917	6.54867	5.15007
3211299	6040	1626	1350	1367	1697	44.9834	2119	1595	3.71094	2.8165
3211297	6036	1896	1206	1154	1780	39.0987	1591	1945	2.78812	3.43682
3211295	6033	1666	1530	1453	1384	49.4447	2470	1640	4.33066	2.89932
3211293	6028	1744	1279	1159	1846	40.4446	2952	1846	5.18004	3.26621
3211291	6026	1322	1617	1288	1799	48.2078	236	947	0.41426	1.67613
3211289	6025	1758	1177	1426	1664	43.2033	1644	1993	2.88626	3.52806
3211287	6024	1729	1222	1421	1652	43.8745	622	1863	1.09218	3.29848
3211285	6020	1565	1300	1075	2080	39.4518	5066	1668	8.90142	2.95519
3211283	6017	1290	1778	1737	1212	58.4178	1339	2660	2.35392	4.71506
3211279	6015	1731	1344	1115	1825	40.8811	2668	2390	4.69181	4.23788
3211281	6015	1784	1176	1215	1840	39.7506	2358	2741	4.14666	4.86026
3211277	6011	1854	1207	1444	1506	44.1025	2549	127	4.48553	0.225342
3211275	6006	1786	1233	1426	1561	44.2724	2643	2353	4.65481	4.17852
3211271	5996	1945	1123	1473	1455	43.2955	38	807	0.0670367	1.43548
3211263	5995	1874	1209	1061	1851	37.8649	3121	4322	5.50675	7.68921
3211269	5995	1790	1155	1293	1757	40.834	1780	1514	3.14066	2.69354
3211267	5995	1050	1768	1424	1753	53.2444	510	2342	0.899853	4.16662
3211265	5995	1675	1298	1124	1898	40.4003	154	842	0.27172	1.49799
3211261	5994	1902	1055	1155	1882	36.8702	1409	729	2.48648	1.29717
3211259	5992	2084	1045	1201	1662	37.4833	5148	1432	9.08777	2.54893
3211257	5992	1886	1242	1088	1776	38.8852	1938	2981	3.42115	5.30611
3211253	5986	1976	941	1041	2028	33.1106	176	1452	0.311004	2.58712
3211251	5985	1159	1437	1456	1933	48.3375	2275	2452	4.02076	4.36961
3211249	5982	1854	1192	1302	1634	41.6917	2397	241	4.2385	0.429691
3211247	5981	1859	1193	1076	1853	37.9368	2206	2499	3.90141	4.45634
3211245	5981	1675	1347	1468	1491	47.0657	1888	297	3.33902	0.529625
3211243	5980	1593	1253	1324	1810	43.0936	3223	1805	5.70098	3.2193
3211241	5969	1825	1116	1119	1909	37.4435	9024	12576	15.9915	22.4712
3211239	5968	1974	1205	1224	1565	40.7004	4409	4524	7.81451	8.08499
3211237	5963	1964	937	1136	1926	34.7644	1143	1529	2.02755	2.73482
3211235	5958	1493	1573	1518	1374	51.8798	1243	1265	2.20679	2.26452
3211233	5957	1672	1176	1153	1956	39.0969	1712	611	3.03995	1.09396
3211231	5942	1819	1202	1296	1625	42.0397	102	1031	0.181576	1.8506
3211229	5939	1724	1365	1390	1460	46.3883	1137	947	2.02506	1.70068
3211227	5935	1758	1195	1051	1931	37.8433	6431	1476	11.4617	2.65248
3211225	5933	1284	1383	1011	2255	40.3506	300	1566	0.534857	2.81516
3211223	5930	1714	1368	1435	1413	47.2681	1195	1176	2.13159	2.11514
3211221	5928	2141	1107	1165	1515	38.3266	1	792	0.00178436	1.42496
3211219	5925	1975	1073	1310	1567	40.2194	622	308	1.11043	0.554432
3211217	5924	1549	1393	1284	1698	45.1891	5847	1671	10.4402	3.00848
3211215	5923	1434	1464	1318	1707	46.9694	447	976	0.798282	1.75749
3211213	5920	1852	1051	1142	1875	37.0439	2380	5835	4.25251	10.5125
3211211	5919	1679	1336	1037	1867	40.0912	4517	2622	8.0722	4.72466
3211207	5916	1601	1303	1269	1743	43.4753	1550	1098	2.77137	1.97952
3211209	5916	1650	1227	1385	1654	44.1515	906	64	1.61991	0.115382
3211205	5915	1958	993	1074	1890	34.9451	3386	3579	6.05512	6.45346
3211203	5912	1306	1598	1288	1720	48.816	1504	947	2.69094	1.70845
3211199	5901	1585	1304	1268	1744	43.5858	824	455	1.47704	0.822378
3211197	5898	1930	1036	1041	1891	35.2153	1374	1722	2.46418	3.11397
3211195	5896	1588	1374	1227	1707	44.1147	14917	13910	26.7617	25.1626
3211193	5896	1750	1372	1234	1540	44.1995	2632	3864	4.72192	6.98981
3211189	5893	1677	1202	1251	1763	41.6257	1079	588	1.93676	1.06421
3211187	5892	1696	1252	1313	1631	43.5336	855	1237	1.53495	2.2392
3211185	5889	1897	1024	1155	1813	37.0012	2317	2366	4.16174	4.28508
3211181	5876	1671	1467	1053	1685	42.8863	2465	599	4.43737	1.08725
3211183	5876	1605	1205	1095	1971	39.1423	434	555	0.781265	1.00739
3211179	5872	1321	1446	1397	1708	48.4162	1691	3925	3.04613	7.12918
3211177	5866	1608	1115	1227	1916	39.925	1020	742	1.83928	1.34911
3211175	5863	1854	1206	1043	1760	38.3592	2279	1270	4.11164	2.31031
3211173	5861	1671	1142	1023	2025	36.9391	2016	2142	3.63839	3.89793
3211171	5859	1269	1667	1435	1488	52.9442	888	134	1.60317	0.243931
3211169	5857	1795	1069	1025	1968	35.7521	5911	4104	10.6752	7.4734
3211167	5853	2042	1001	1320	1490	39.6549	3416	4057	6.17348	7.39286
3211165	5852	1775	1266	1135	1676	41.0287	2396	2127	4.33085	3.87658
3211161	5848	1699	1332	1326	1491	45.4514	621	1124	1.12325	2.04996
3211155	5845	1749	1046	1181	1869	38.1009	2689	2695	4.86628	4.91768
3211157	5845	1579	1259	999	2008	38.6313	965	93	1.74636	0.169701
3211159	5845	1836	988	1109	1912	35.8768	807	892	1.46043	1.62767
3211151	5842	1598	1200	1182	1862	40.7737	1619	1454	2.9314	2.65454
3211149	5834	1977	997	992	1868	34.0932	1073	5706	1.94547	10.4316
3211147	5831	1747	1207	1221	1656	41.6395	847	690	1.53649	1.26209
3211145	5831	1844	1146	1152	1689	39.41	10	604	0.0181404	1.10479
3211143	5827	1704	1104	1035	1984	36.7084	338	2006	0.613567	3.67174
3211141	5826	1455	1449	1357	1565	48.1634	111	1321	0.201531	2.41835
3211137	5814	1646	1211	1269	1688	42.6557	1989	1679	3.61868	3.08008
3211135	5812	1867	1109	1022	1814	36.6655	161	797	0.293016	1.46258
3211133	5809	1756	1177	1260	1616	41.9521	2056	1839	3.7438	3.3765
3211129	5804	1476	1397	1791	1140	54.9276	2180	1515	3.97301	2.78401
3211127	5803	1603	1287	1270	1643	44.0634	515	1625	0.938739	2.98667
3211123	5798	1516	1445	1456	1381	50.0345	823	837	1.50145	1.53969
3211121	5797	1922	1139	970	1766	36.3809	617	553	1.12583	1.01744
3211119	5793	1870	1053	1060	1810	36.4751	545	2373	0.995138	4.36898
3211115	5789	2039	1010	916	1824	33.27	862	746	1.57505	1.37443
3211117	5789	1778	1074	1265	1672	40.4042	457	3961	0.835032	7.29772
3211113	5777	1609	1243	1155	1770	41.5094	6305	5466	11.5444	10.0914
3211111	5776	1963	1056	1232	1525	39.6122	849	1863	1.55479	3.4401
3211109	5772	1804	1075	1137	1756	38.3229	1482	1093	2.71589	2.01967
3211107	5772	1457	1462	1327	1526	48.3195	663	2829	1.215	5.22748
3211105	5768	1715	1109	1064	1880	37.6734	2471	21423	4.53146	39.6133
3211103	5765	1999	1036	904	1826	33.6513	1030	940	1.88985	1.73906
3211099	5763	1709	1460	1287	1307	47.6661	1958	1591	3.5938	2.94447
3211101	5763	1510	1452	1368	1433	48.9328	1234	1577	2.26494	2.91856
3211097	5761	1825	1138	995	1803	37.0248	2766	1949	5.07861	3.60828
3211095	5760	1644	1183	1273	1660	42.6389	1709	1377	3.13841	2.54975
3211093	5759	1367	1379	1219	1794	45.112	4447	301	8.1679	0.557449
3211091	5755	1424	1429	1464	1438	50.2693	171	1596	0.314298	2.95783
3211089	5749	1791	931	1038	1989	34.2494	3805	5349	7.00088	9.92353
3211087	5749	1800	1053	1252	1644	40.0939	2389	1330	4.39556	2.46743
3211085	5748	1569	1175	1198	1806	41.2839	778	606	1.4317	1.12445
3211083	5727	1553	1372	1110	1692	43.3386	2014	2549	3.71983	4.7471
3211081	5724	1805	1158	1182	1579	40.8805	1807	1048	3.33925	1.95275
3211079	5722	1939	1004	1224	1555	38.9374	1690	1335	3.12413	2.4884
3211077	5718	1857	1135	970	1756	36.8136	1563	1452	2.89138	2.70837
3211075	5718	1639	1159	974	1946	37.3033	261	1694	0.482822	3.15977
3211073	5717	1661	1371	1138	1547	43.8867	1298	1730	2.40158	3.22748
3211071	5716	1917	999	959	1841	34.2547	26	1297	0.048114	2.4201
3211067	5713	1680	1286	1180	1567	43.1647	2642	1884	4.89169	3.51725
3211069	5713	1891	1066	1130	1626	38.4386	480	2836	0.888725	5.29454
3211065	5709	1170	1525	1347	1667	50.3065	21	665	0.038909	1.24236
3211061	5703	1836	1104	1273	1490	41.6798	364	704	0.675132	1.3166
3211063	5703	1690	1129	1187	1697	40.6102	270	1079	0.500784	2.01792
3211059	5700	1634	1056	1277	1733	40.9298	1910	4832	3.54445	9.04145
3211057	5697	1510	1336	1436	1415	48.6572	78	1296	0.144823	2.4263
3211055	5694	1587	1078	1175	1854	39.568	30930	25348	57.4583	47.4802
3211053	5692	1768	1167	1114	1643	40.0738	539	104	1.00165	0.194874
3211051	5691	1679	1118	1194	1700	40.6255	1473	2287	2.73782	4.28611
3211049	5689	1651	1043	1033	1962	36.4915	969	894	1.80168	1.67605
3211047	5688	1984	1130	1155	1419	40.1723	48	1506	0.0892631	2.82391
3211045	5681	1559	1308	1346	1468	46.7171	80	2081	0.148955	3.90691
3211043	5679	1485	1242	1149	1803	42.1025	836	1424	1.55713	2.67439
3211041	5678	1507	1213	1159	1799	41.7753	29	2184	0.0540248	4.10245
3211039	5676	1846	1179	1079	1572	39.7815	2666	2729	4.9683	5.12799
3211037	5672	1860	1074	944	1794	35.5783	1946	1488	3.62908	2.79803
3211035	5669	1432	1286	1298	1653	45.5812	906	757	1.69049	1.42421
3211033	5667	1697	1097	1229	1644	41.0446	4448	3647	8.30237	6.86386
3211031	5664	1899	919	1071	1775	35.1342	1	745	0.00186753	1.40288
3211029	5655	1179	1672	1388	1416	54.1114	1	966	0.0018705	1.82192
3211027	5653	1579	1176	1277	1621	43.3929	746	2174	1.39589	4.10172
3211025	5652	1829	1011	1192	1620	38.9774	837	919	1.56644	1.7342
3211023	5642	1600	1344	1124	1574	43.7434	766	1441	1.4361	2.72406
3211021	5641	1489	1195	1082	1875	40.3652	1051	1695	1.97077	3.20479
3211019	5640	1497	1383	1157	1603	45.0355	1070	1236	2.00676	2.33736
3211017	5635	1832	1037	935	1831	34.9956	3406	6393	6.39354	12.1003
3211015	5635	1593	1249	1068	1725	41.118	1344	3339	2.52288	6.31987
3211013	5632	1729	1169	1158	1576	41.3175	160	865	0.300502	1.6381
3211011	5631	1738	934	1096	1863	36.0504	1109	1267	2.08323	2.39981
3211009	5629	1650	1088	1158	1733	39.9005	2435	1137	4.57571	2.15434
3211007	5628	1560	1117	1066	1885	38.7882	1495	1817	2.80981	3.44339
3211005	5626	1674	1258	1173	1521	43.2101	1635	3017	3.07403	5.71955
3211003	5625	1527	1354	1271	1473	46.6667	1567	1287	2.94671	2.44029
3211001	5625	1905	1036	1048	1636	37.0489	1077	1301	2.02527	2.46684
3210999	5624	1685	1119	1113	1707	39.6871	1446	738	2.71965	1.39958
3210997	5620	1764	1037	1107	1712	38.1495	2562	115	4.82207	0.218247
3210995	5619	1815	855	979	1970	32.6393	1939	3211	3.65014	6.09491
3210993	5613	1736	1108	1102	1667	39.3729	300	751	0.565349	1.42702
3210991	5609	1673	1072	1202	1662	40.542	35504	18178	66.9549	34.5658
3210989	5608	1622	956	1093	1937	36.5371	619	870	1.16754	1.65462
3210987	5607	1696	1172	983	1756	38.4341	619	1597	1.16775	3.03781
3210985	5606	1652	1015	1160	1779	38.7977	1393	1239	2.62838	2.35724
3210983	5603	1714	1171	1197	1521	42.2631	2797	2555	5.28034	4.86358
3210981	5593	1412	1337	1099	1745	43.5544	1874	28	3.54418	0.0533948
3210979	5591	1541	1176	1305	1569	44.3749	1083	518	2.04894	0.988158
3210977	5589	1619	1002	1044	1924	36.6076	169	3104	0.319848	5.92343
3210973	5581	1471	1264	1296	1550	45.8699	467	903	0.885106	1.72569
3210971	5580	1695	1147	1021	1717	38.853	2125	858	4.02824	1.63998
3210967	5579	1587	1214	1054	1724	40.6524	2433	1333	4.61292	2.54835
3210969	5579	1703	998	1111	1767	37.8025	1130	1215	2.14246	2.32277
3210965	5576	1770	1046	1398	1362	43.8307	1940	6	3.68018	0.0114766
3210963	5574	1617	1044	1104	1809	38.5361	103	5526	0.195461	10.5738
3210961	5572	1404	1300	1352	1516	47.5951	4	3169	0.00759345	6.06593
3210959	5570	1530	1188	1149	1703	41.9569	1388	99	2.63587	0.189568
3210955	5569	1681	1243	1237	1408	44.5322	3894	723	7.39621	1.38467
3210957	5569	1665	1021	1064	1819	37.4394	1025	4697	1.94687	8.99558
3210951	5565	1650	1053	1214	1648	40.7367	539	647	1.0245	1.24001
3210949	5562	1679	1109	1161	1613	40.8127	2	3613	0.00380355	6.92824
3210947	5560	1517	1183	1181	1679	42.518	1236	1045	2.35144	2.0046
3210945	5558	1604	1034	1179	1741	39.8165	56	7092	0.106576	13.6093
3210941	5557	1791	1108	962	1696	37.2503	2315	2676	4.40657	5.13608
3210943	5557	1629	1003	1127	1798	38.33	1420	324	2.70295	0.621857
3210939	5552	1961	1027	1480	1084	45.1549	814	2409	1.55083	4.62779
3210937	5549	1617	995	1063	1874	37.0878	1773	1342	3.37975	2.57943
3210935	5547	1504	1131	983	1929	38.1107	1595	1233	3.04154	2.37078
3210933	5544	1545	1194	1112	1693	41.5945	112	708	0.21369	1.36206
3210931	5543	1475	1296	1402	1370	48.674	579	1656	1.1049	3.18641
3210929	5538	1266	1527	1324	1421	51.4807	2388	1837	4.56112	3.53787
3210921	5537	1623	1072	1027	1815	37.9086	4036	4301	7.71022	8.28478
3210927	5537	1429	1388	1107	1613	45.0605	1987	2821	3.79589	5.43394
3210925	5537	1887	981	1080	1589	37.2223	439	3088	0.838649	5.94824
3210923	5537	1642	1162	1346	1387	45.2953	403	1389	0.769876	2.67555
3210919	5533	1436	1547	1225	1325	50.0994	46468	18141	88.8349	34.9693
3210917	5531	1553	1182	1167	1629	42.4697	386	898	0.7382	1.73164
3210913	5529	1691	932	1069	1837	36.191	681	1068	1.30284	2.06021
3210911	5526	1361	1574	1503	1088	55.6822	43338	13996	82.9561	27.0134
3210909	5524	1735	1012	1059	1718	37.4909	2773	1969	5.3099	3.8017
3210907	5521	1474	1211	1020	1816	40.4093	2041	1376	3.91035	2.65819
3210905	5520	1779	924	1039	1778	35.5616	2426	8051	4.64881	15.556
3210901	5516	1790	1020	1042	1664	37.3822	2845	330	5.45567	0.638081
3210903	5516	1746	1154	925	1691	37.6904	2112	2972	4.05005	5.74659
3210899	5514	1813	1114	1596	991	49.1476	3928	5946	7.53521	11.5012
3210897	5513	1358	1334	1248	1573	46.8348	699	349	1.34116	0.675186
3210893	5505	1805	939	1155	1606	38.0381	593	2555	1.13943	4.95016
3210891	5503	1761	967	1085	1690	37.2888	386	1252	0.741956	2.42656
3210889	5502	1364	1360	1218	1560	46.8557	651	1027	1.25156	1.99084
3210887	5496	1564	919	1203	1810	38.6099	695	1244	1.33761	2.41412
3210885	5495	1689	969	1019	1818	36.1783	835	1075	1.60735	2.08654
3210883	5493	1561	1156	1082	1694	40.7428	1974	435	3.80126	0.844628
3210881	5491	1917	953	1266	1355	40.4116	1657	2324	3.19199	4.51409
3210879	5490	1254	1146	1295	1795	44.4627	1565	1165	3.01531	2.26329
3210877	5489	1695	1005	1136	1653	39.0053	309	3454	0.595464	6.71143
3210875	5488	1627	1175	992	1694	39.4862	1960	1807	3.77774	3.5118
3210873	5481	1694	978	1046	1763	36.9276	1168	1852	2.2541	3.60385
3210871	5476	1711	1012	1149	1604	39.4631	232	571	0.448141	1.11214
3210869	5475	1690	971	1007	1807	36.1279	528	869	1.02009	1.69286
3210867	5469	1550	1209	1069	1641	41.653	5898	6891	11.4074	13.4388
3210865	5468	1453	1121	1251	1643	43.3797	144	927	0.278564	1.80816
3210863	5466	1442	1163	1044	1817	40.3769	2803	699	5.4243	1.36393
3210861	5463	1502	1160	1059	1742	40.6187	2515	537	4.86964	1.0484
3210859	5462	1434	1336	1226	1466	46.9059	598	299	1.15808	0.583856
3210857	5461	1356	1300	1163	1642	45.1016	212	1385	0.410633	2.70498
3210855	5460	1867	1068	984	1541	37.5824	725	742	1.40455	1.44943
3210853	5459	1808	922	1179	1550	38.4869	2571	362	4.98172	0.707264
3210851	5458	1230	1192	870	2166	37.7794	275	555	0.532954	1.08454
3210849	5455	1477	1130	1159	1689	41.9615	776	1366	1.50473	2.6708
3210847	5455	1452	1238	1057	1708	42.0715	312	1382	0.604993	2.70209
3210845	5454	1365	1270	1382	1437	48.6249	689	213	1.33627	0.416534
3210843	5451	1441	1025	1084	1901	38.6901	86	2880	0.166883	5.63511
3210841	5448	1581	1171	1241	1455	44.2731	4159	4234	8.07499	8.28895
3210839	5446	1492	1191	1282	1481	45.4095	2767	2865	5.3743	5.61091
3210837	5444	1637	1041	1118	1648	39.6583	1453	818	2.82318	1.60259
3210835	5439	1642	953	1029	1815	36.4405	1608	3032	3.12721	5.94561
3210833	5438	1696	933	1037	1772	36.2266	4093	1435	7.96146	2.81448
3210831	5438	1381	1250	1138	1669	43.9132	786	3255	1.52888	6.38407
3210829	5437	1518	1084	1223	1612	42.4315	2349	2237	4.56998	4.38826
3210827	5434	1645	1082	943	1764	37.2654	1562	2745	3.04055	5.38777
3210825	5434	1431	1265	1292	1446	47.0556	909	863	1.76944	1.69386
3210823	5429	1549	989	1054	1837	37.6312	7999	4888	15.585	9.60279
3210821	5429	1658	994	1306	1471	42.3651	894	909	1.74184	1.78579
3210817	5416	1468	1173	1011	1764	40.325	1545	1617	3.01745	3.18432
3210813	5413	1636	1184	893	1700	38.3706	2021	4311	3.94929	8.49427
3210811	5413	1559	1133	1098	1623	41.2156	1122	736	2.19253	1.45019
3210809	5409	1699	1064	1187	1459	41.6158	237	3882	0.46347	7.65464
3210807	5406	1713	1075	951	1667	37.4769	425	530	0.831579	1.04565
3210805	5403	1261	1614	1568	960	58.8932	1677	212	3.28313	0.418492
3210803	5402	1727	894	963	1818	34.3762	640	768	1.25319	1.51633
3210797	5391	1191	1239	1424	1537	49.3971	178	556	0.349254	1.1
3210795	5390	1714	980	1040	1656	37.4768	909	1532	1.78388	3.03149
3210791	5383	1726	1144	1005	1508	39.922	5447	5326	10.7034	10.5527
3210789	5380	1490	1194	1307	1389	46.487	350	2082	0.688139	4.12747
3210785	5372	1505	1216	1035	1616	41.9025	1636	476	3.22135	0.945055
3210783	5371	1775	1062	948	1586	37.4232	1215	1498	2.39283	2.9747
3210781	5370	1650	970	955	1795	35.8473	2363	2842	4.65457	5.64463
3210779	5367	1570	1033	1171	1593	41.0658	1666	4584	3.28348	9.10959
3210775	5365	1593	1127	1159	1486	42.6095	1186	3152	2.33833	6.26617
3210777	5365	1386	1108	1525	1346	49.0774	944	132	1.8612	0.262416
3210773	5361	1670	880	1066	1745	36.2992	736	758	1.45219	1.50803
3210771	5360	1768	1076	869	1647	36.2873	1311	983	2.58719	1.95603
3210769	5358	1652	1026	1108	1572	39.8283	1386	3715	2.73622	7.39507
3210767	5356	1593	1184	1293	1286	46.2472	1116	245	2.20401	0.487878
3210765	5354	1531	1024	1177	1622	41.1095	1028	2336	2.03098	4.65351
3210763	5353	1434	1266	928	1725	40.9864	969	2181	1.91477	4.34555
3210761	5351	1776	969	1148	1458	39.5627	1150	1851	2.27328	3.68941
3210759	5350	1458	1060	914	1918	36.8972	1673	25	3.30775	0.0498393
3210757	5347	1732	1006	1046	1563	38.3767	1436	326	2.84076	0.650269
3210755	5346	1617	1361	1342	1026	50.5612	2023	2460	4.00274	4.90786
3210753	5341	1825	983	945	1588	36.0981	2954	1923	5.8503	3.8401
3210751	5338	1648	1037	1027	1626	38.6662	2	6300	0.00396316	12.5877
3210749	5336	1315	1331	1258	1432	48.5195	4520	116	8.9601	0.231861
3210747	5333	1178	1496	875	1784	44.459	3617	3151	7.1741	6.30177
3210743	5325	1349	1064	1260	1652	43.6432	1519	1131	3.01737	2.26532
3210741	5323	1527	1131	1093	1572	41.781	2524	1315	5.0156	2.63485
3210739	5322	1784	1015	942	1581	36.7719	921	365	1.83052	0.731483
3210737	5321	1504	1079	1080	1658	40.5751	1019	1849	2.02568	3.70621
3210735	5319	1411	1170	1204	1534	44.6324	139	2135	0.276424	4.28108
3210733	5317	1517	1129	1064	1607	41.2451	2352	999	4.67909	2.00394
3210729	5317	1444	1299	1290	1284	48.6929	2288	1496	4.55176	3.0009
3210727	5316	1563	1005	1042	1706	38.5064	3682	229	7.32638	0.459448
3210725	5314	1529	1037	1263	1485	43.2819	373	2684	0.742468	5.387
3210723	5309	1297	1247	1290	1475	47.7868	776	1063	1.54611	2.13553
3210719	5306	1678	1097	1371	1160	46.5134	1883	9551	3.75382	19.1985
3210721	5306	1596	1058	1195	1457	42.4614	1667	1621	3.32322	3.25838
3210717	5305	1657	1073	860	1715	36.4373	396	2721	0.789587	5.47053
3210713	5297	1450	1104	1262	1481	44.6668	2638	2626	5.26787	5.2875
3210711	5297	1217	1317	1302	1461	49.4431	2211	164	4.41519	0.330217
3210709	5293	958	1467	1505	1363	56.1496	597	849	1.19306	1.71077
3210707	5292	1389	1444	1387	1072	53.4958	1495	349	2.98821	0.703382
3210705	5289	1642	1200	1015	1432	41.8794	643	585	1.28596	1.17969
3210703	5287	1393	1227	1236	1431	46.586	912	309	1.82463	0.623355
3210701	5286	1392	1204	1031	1659	42.2815	1601	1821	3.20372	3.67425
3210699	5285	1562	995	1029	1699	38.2971	4687	4507	9.38081	9.09554
3210697	5285	1384	1255	980	1666	42.2895	3023	2657	6.05039	5.36207
3210695	5284	1761	982	897	1644	35.5602	1588	1798	3.17891	3.62922
3210693	5283	1688	1046	898	1651	36.7973	1891	2391	3.78618	4.82708
3210691	5279	1714	841	1092	1632	36.6168	1725	841	3.45643	1.69914
3210685	5278	1466	1107	967	1738	39.2952	1938	1600	3.88396	3.23323
3210687	5278	1440	1372	1274	1192	50.1326	1127	728	2.25863	1.47112
3210689	5278	1542	1244	1345	1147	49.0527	386	931	0.773586	1.88134
3210679	5275	1476	1061	1077	1661	40.5308	984	1363	1.97316	2.75587
3210681	5275	1670	962	1221	1422	41.3839	924	535	1.85285	1.08173
3210675	5273	1457	1147	978	1691	40.2996	1098	1102	2.2026	2.229
3210673	5269	1324	1162	1384	1399	48.3204	1918	1739	3.85044	3.52012
3210669	5268	1743	890	1088	1547	37.5475	697	1156	1.39951	2.34044
3210671	5268	1541	1037	962	1728	37.9461	504	444	1.01199	0.898924
3210665	5260	1431	1182	1219	1428	45.6464	571	590	1.14826	1.19633
3210661	5256	1660	961	1119	1516	39.5738	2020	2476	4.06524	5.02437
3210659	5255	1708	927	998	1622	36.6318	16	1631	0.0322061	3.3103
3210657	5251	1606	1101	1059	1485	41.135	3472	2589	6.99404	5.25867
3210655	5249	1716	1078	993	1462	39.4551	5546	1326	11.1762	2.69434
3210649	5248	1526	1099	1158	1465	43.0069	1597	1112	3.21886	2.25994
3210651	5248	1458	1230	1058	1502	43.5976	1042	3247	2.10022	6.59894
3210653	5248	1475	1109	1179	1485	43.5976	803	4276	1.6185	8.6902
3210647	5247	1618	1121	1167	1341	43.6059	1027	2330	2.07038	4.73621
3210643	5246	1477	1074	1104	1591	41.5173	702	576	1.41547	1.17106
3210641	5243	1607	1078	1069	1489	40.9498	207	567	0.41762	1.15342
3210639	5240	1368	1253	1198	1421	46.7748	631	1883	1.27376	3.8327
3210637	5236	1547	1171	1145	1373	44.2322	360	1285	0.727266	2.61752
3210635	5234	1669	1106	1119	1340	42.5105	231	545	0.466841	1.11058
3210633	5233	1632	1091	949	1561	38.9834	2813	2420	5.68603	4.93231
3210631	5232	1619	965	1033	1615	38.1881	2825	1365	5.71138	2.7826
3210629	5231	1299	1262	1057	1613	44.3319	1768	1626	3.5751	3.31529
3210627	5230	1261	1127	994	1848	40.5545	611	177	1.23575	0.360959
3210623	5229	1857	891	870	1611	33.6776	1739	2626	3.5178	5.35626
3210625	5229	1309	1203	1004	1713	42.2069	1254	1334	2.5367	2.72097
3210621	5224	1527	1029	1048	1620	39.7588	1016	482	2.05722	0.984079
3210617	5223	1431	1100	1200	1492	44.036	1944	2129	3.93701	4.34752
3210615	5221	1096	1233	1000	1892	42.7696	5891	6994	11.9351	14.2876
3210613	5220	1625	979	953	1663	37.0115	2075	4547	4.20473	9.29053
3210609	5218	1563	847	1023	1785	35.8375	2101	1410	4.25905	2.88205
3210611	5218	1395	1264	1243	1316	48.0452	828	1680	1.67848	3.43393
3210605	5217	1393	1267	1048	1509	44.3742	1058	787	2.14514	1.60894
3210603	5217	1468	1055	914	1780	37.742	924	1536	1.87345	3.14019
3210601	5216	1615	1026	995	1580	38.7462	2257	1883	4.57704	3.85034
3210597	5214	1667	936	959	1652	36.3445	2304	1179	4.67414	2.41173
3210595	5211	1450	1205	1288	1268	47.8411	1937	2556	3.93187	5.23149
3210593	5210	1681	864	920	1745	34.2418	156	1034	0.316721	2.11675
3210591	5208	1565	1096	1013	1534	40.4954	1091	769	2.21587	1.57486
3210587	5205	1644	949	1101	1511	39.3852	2306	2406	4.68629	4.93016
3210585	5205	1509	1077	1052	1567	40.903	7	493	0.0142255	1.01021
3210583	5204	1349	1203	1003	1649	42.3905	1610	1253	3.2725	2.56803
3210581	5200	1468	964	1118	1650	40.0385	1820	1954	3.70219	4.00781
3210575	5199	1578	1127	982	1512	40.5655	5998	4015	12.2033	8.23667
3210577	5199	1602	1153	1004	1440	41.4887	1840	1988	3.74359	4.07833
3210579	5199	1467	1185	1137	1410	44.6624	1079	64	2.19529	0.131294
3210573	5198	1536	1046	1022	1594	39.7845	1665	1510	3.38819	3.09832
3210571	5198	1765	935	798	1700	33.3397	172	863	0.350012	1.77076
3210569	5195	1292	1060	923	1920	38.1713	586	264	1.19317	0.542006
3210567	5194	1784	951	935	1524	36.3111	977	1058	1.98968	2.17255
3210563	5190	931	1440	1432	1387	55.3372	555	1239	1.13114	2.54618
3210561	5189	1548	1016	913	1712	37.1748	875	2235	1.78367	4.59388
3210559	5188	1657	970	1062	1499	39.1673	469	543	0.956232	1.11631
3210557	5187	1413	1149	1027	1598	41.951	2	3657	0.00407853	7.5196
3210553	5185	1469	1068	1133	1515	42.4494	2090	604	4.26371	1.24244
3210555	5185	1606	1066	929	1584	38.4764	792	824	1.61572	1.69498
3210551	5181	1557	1197	1047	1380	43.3121	46	523	0.0939149	1.07665
3210547	5180	1418	1186	1641	935	54.5753	1542	364	3.1488	0.749476
3210549	5180	1559	1087	1078	1456	41.7954	914	1412	1.86641	2.90731
3210545	5178	1672	998	899	1609	36.6358	3375	2186	6.89449	4.50271
3210543	5178	1599	1075	849	1655	37.1572	1222	2363	2.49632	4.86729
3210541	5177	1521	1111	948	1597	39.7721	20	2003	0.0408641	4.12657
3210539	5172	1232	1260	1170	1510	46.9838	2716	1995	5.55471	4.11406
3210537	5169	1578	1010	1142	1439	41.6328	1629	1834	3.33353	3.78424
3210533	5168	1546	1133	1099	1390	43.1889	3980	2846	8.14612	5.87352
3210535	5168	1727	899	945	1597	35.6811	424	1981	0.867828	4.08835
3210531	5166	1459	1077	978	1652	39.7793	1613	1661	3.30271	3.42927
3210529	5160	1585	1023	1061	1491	40.3876	1140	1899	2.33693	3.92519
3210525	5159	1398	1013	1103	1645	41.0157	2222	2821	4.55584	5.83208
3210527	5159	1402	1052	1045	1660	40.6474	1979	2883	4.05761	5.96026
3210523	5156	1680	826	810	1840	31.73	107	757	0.219514	1.56592
3210521	5155	1407	1225	1143	1380	45.936	642	1261	1.31734	2.60899
3210517	5149	1310	1345	1290	1204	51.175	2773	1541	5.69662	3.19202
3210515	5148	1494	1165	1192	1297	45.7848	1986	1893	4.08067	3.92191
3210513	5147	1382	989	1293	1483	44.3365	2040	630	4.19244	1.30549
3210511	5144	1379	1095	1220	1450	45.0039	4927	1578	10.1315	3.27184
3210509	5143	1385	1169	1097	1492	44.0599	6246	8614	12.8462	17.8638
3210507	5138	1687	871	870	1710	33.8848	634	382	1.30523	0.792967
3210503	5135	1388	1097	1093	1557	42.6485	3905	3067	8.04398	6.37029
3210501	5134	1588	928	941	1677	36.4044	3166	2087	6.52297	4.33563
3210497	5131	1511	1029	1017	1574	39.8753	1467	1726	3.02426	3.58777
3210499	5131	1665	911	954	1601	36.3477	474	1047	0.977162	2.17636
3210495	5130	1506	1116	970	1538	40.6628	980	754	2.02069	1.56762
3210493	5130	1424	1153	934	1619	40.6823	974	609	2.00832	1.26615
3210491	5130	1518	1010	1038	1564	39.922	501	1235	1.03302	2.56765
3210489	5130	1388	1195	1185	1362	46.3938	88	551	0.181449	1.14557
3210487	5129	1094	1101	1259	1675	46.0129	2183	116	4.50206	0.241219
3210485	5127	1577	1144	1225	1181	46.2064	4517	4390	9.31917	9.13245
3210483	5126	1797	1077	1254	998	45.4741	2686	2505	5.54265	5.21213
3210481	5122	1572	834	1048	1668	36.7435	1391	1569	2.87262	3.26715
3210479	5116	1223	1091	1185	1617	44.4879	1102	1228	2.27846	2.56008
3210477	5115	1388	1149	1260	1318	47.0968	752	1064	1.55512	2.21861
3210475	5110	1286	1197	978	1649	42.5636	319	1228	0.660329	2.56309
3210473	5106	1572	1049	1149	1336	43.0474	690	1407	1.42942	2.939
3210471	5105	1437	1141	997	1530	41.8805	3334	44	6.90813	0.091927
3210469	5104	1466	1127	1106	1405	43.75	499	30	1.03414	0.0626898
3210467	5103	1748	943	856	1556	35.2538	4099	6114	8.49655	12.7787
3210465	5100	1351	1222	980	1547	43.1765	840	766	1.74221	1.60193
3210463	5099	1092	1397	1106	1504	49.0881	303	541	0.628562	1.13161
3210461	5098	1814	937	770	1577	33.4837	1388	1312	2.87992	2.74486
3210459	5096	1126	1418	1313	1239	53.5911	316	709	0.655916	1.48389
3210457	5094	1293	1094	965	1742	40.4201	1901	1601	3.94742	3.35211
3210455	5093	1494	1077	1052	1470	41.8025	1306	1351	2.71244	2.82923
3210453	5092	1625	942	1030	1495	38.7274	4031	2630	8.37365	5.50875
3210451	5088	1120	1395	1482	1091	56.5448	534	754	1.11016	1.58056
3210449	5086	1501	1009	1167	1409	42.7841	479	1942	0.996207	4.07248
3210447	5085	1578	1054	1114	1339	42.6352	1360	1047	2.82904	2.19605
3210445	5084	1539	978	942	1625	37.7655	1716	788	3.57028	1.65313
3210443	5078	1400	1061	995	1622	40.4884	706	196	1.47063	0.41167
3210441	5072	1404	1087	995	1586	41.0489	2026	2416	4.22523	5.08047
3210437	5071	1672	833	1048	1518	37.0933	1183	2146	2.46764	4.51359
3210439	5071	1244	1327	1370	1130	53.1848	759	144	1.58321	0.302869
3210435	5069	1573	1052	1046	1398	41.3888	431	3467	0.899384	7.29487
3210433	5067	1719	1092	935	1321	40.0039	630	350	1.31516	0.736721
3210431	5061	1512	992	1086	1471	41.0591	1137	299	2.37637	0.630116
3210429	5060	1565	926	1088	1481	39.8024	1656	1814	3.46179	3.8236
3210425	5059	1325	1233	966	1535	43.4671	775	994	1.62042	2.0956
3210427	5059	1597	986	1002	1474	39.2963	194	501	0.405628	1.05623
3210423	5054	1531	1012	1050	1461	40.7994	1360	1152	2.84639	2.4311
3210417	5053	1593	913	943	1604	36.7307	188	580	0.393549	1.22423
3210421	5053	1412	1132	1192	1317	45.9925	32	1142	0.0669871	2.41048
3210415	5051	1599	904	961	1587	36.9234	2718	1346	5.69197	2.84219
3210411	5046	1691	1036	963	1356	39.6155	1667	1799	3.49445	3.80251
3210409	5042	1431	973	913	1725	37.4058	154	1076	0.323079	2.27612
3210407	5041	1293	1066	964	1718	40.2698	18	938	0.0377699	1.9846
3210405	5038	1437	1129	1046	1426	43.1719	921	1355	1.93371	2.86858
3210403	5035	1359	1069	1157	1450	44.2105	2032	1459	4.26889	3.09059
3210399	5033	1548	1023	1059	1403	41.367	1065	2668	2.23827	5.65386
3210401	5033	1273	1039	1043	1678	41.367	269	718	0.565348	1.52154
3210397	5032	1275	1096	896	1765	39.5866	483	302	1.01531	0.640107
3210395	5028	1664	1020	878	1466	37.7486	1722	2346	3.62267	4.97644
3210389	5025	1371	1071	940	1643	40.0199	1602	1512	3.37223	3.20924
3210387	5024	1457	977	904	1686	37.4403	477	174	1.00429	0.36939
3210385	5018	1404	1081	967	1566	40.8131	2245	1887	4.73234	4.01076
3210381	5016	1361	1103	1072	1480	43.3612	2185	4657	4.6077	9.90227
3210379	5015	1725	897	816	1577	34.1575	1548	2351	3.26505	4.99997
3210375	5014	1453	1005	932	1624	38.6318	3130	81	6.60314	0.172301
3210377	5014	1664	987	1040	1323	40.4268	1231	863	2.59695	1.83575
3210373	5013	1563	961	1064	1425	40.395	811	810	1.71125	1.72335
3210371	5011	1440	977	1019	1575	39.8324	265	561	0.559386	1.19406
3210365	5009	1455	892	1059	1603	38.9499	2438	4565	5.14841	9.72021
3210367	5009	1630	972	1022	1385	39.8083	1576	107	3.32809	0.227834
3210363	5006	1449	936	1052	1569	39.7123	1433	981	3.02793	2.09009
3210361	5006	1323	1047	1093	1543	42.7487	1427	2611	3.01525	5.56291
3210359	5005	1316	1181	1111	1397	45.7942	2690	2859	5.68511	6.09251
3210357	5004	1515	850	1017	1622	37.3102	1250	2299	2.64231	4.90013
3210353	5000	1351	1165	1032	1452	43.94	1680	1828	3.5541	3.89935
3210351	4998	1678	900	1181	1239	41.6367	32839	9814	69.4999	20.9428
3210349	4997	1321	1169	1045	1462	44.3066	386	1909	0.817087	4.07458
3210345	4996	1542	1003	1016	1435	40.4123	3029	949	6.41309	2.02595
3210343	4996	1335	1102	970	1589	41.4732	892	1172	1.88857	2.50202
3210347	4996	1654	908	1019	1415	38.5709	742	4014	1.57098	8.56921
3210341	4995	1137	1080	1209	1569	45.8258	60	2502	0.127059	5.34242
3210337	4992	1555	738	915	1784	33.113	1452	2096	3.07668	4.47819
3210339	4992	1577	994	835	1586	36.6386	595	1185	1.26076	2.5318
3210335	4991	1433	1129	926	1503	41.1741	1523	2583	3.22777	5.51979
3210333	4991	1029	1491	1174	1297	53.3961	176	1006	0.373006	2.14979
3210331	4988	1144	1232	1065	1547	46.0505	667	768	1.41446	1.64218
3210329	4985	1306	1231	1179	1269	48.345	2087	1338	4.42841	2.86271
3210327	4984	1449	1174	976	1385	43.138	291	1040	0.617597	2.22557
3210325	4982	1115	1226	1091	1550	46.5074	801	1979	1.70067	4.2367
3210323	4981	1795	865	790	1531	33.2263	1078	1377	2.28925	2.94852
3210319	4976	1337	1130	1183	1326	46.4831	2880	3085	6.12213	6.61242
3210321	4976	1727	895	714	1640	32.3352	1309	1082	2.78259	2.31917
3210313	4964	1429	1163	1037	1335	44.3191	1995	2029	4.2511	4.3595
3210311	4961	1274	956	1183	1548	43.1163	1248	1788	2.66094	3.84401
3210309	4961	1529	1071	966	1395	41.0603	75	905	0.159913	1.94565
3210307	4959	1487	936	1023	1513	39.5039	516	2144	1.10064	4.61123
3210305	4956	1455	1056	943	1502	40.3349	1284	1311	2.74046	2.82135
3210303	4953	1280	1198	970	1505	43.7715	4221	4831	9.01441	10.4029
3210301	4951	1456	1010	950	1535	39.588	1744	1319	3.72601	2.84144
3210299	4951	1554	918	983	1496	38.3963	1031	756	2.2027	1.6286
3210297	4951	1477	822	1012	1640	37.043	584	1510	1.2477	3.25289
3210295	4949	1108	1276	1087	1478	47.747	687	723	1.46835	1.55814
3210293	4946	1198	1207	1215	1326	48.9689	255	519	0.545351	1.11918
3210291	4944	1397	1044	1057	1446	42.496	1302	1582	2.78563	3.41282
3210287	4941	1388	1163	961	1429	42.9872	1203	574	2.57538	1.23903
3210283	4939	1560	995	964	1420	39.6639	2159	2398	4.62385	5.17841
3210281	4937	1632	865	1160	1280	41.0168	1803	1324	3.86298	2.86029
3210277	4935	1665	927	1038	1305	39.8176	697	2542	1.49395	5.49382
3210273	4934	1470	1021	1082	1361	42.6226	1767	119	3.78816	0.257237
3210271	4932	1356	991	1024	1561	40.8556	1008	625	2.16186	1.35158
3210269	4930	1392	895	962	1681	37.6673	884	4982	1.89669	10.7781
3210267	4926	1590	1008	1150	1178	43.8084	679	1088	1.45803	2.3557
3210265	4920	1405	1025	1107	1383	43.3333	5328	14869	11.4549	32.2331
3210263	4919	1432	809	904	1774	34.8242	1767	1688	3.79971	3.66
3210259	4917	1246	1125	870	1676	40.5735	1693	1602	3.64206	3.47495
3210257	4916	1507	979	970	1460	39.6461	1840	1001	3.9591	2.17174
3210255	4915	1396	1039	1007	1473	41.6277	4485	4666	9.65227	10.1253
3210253	4915	1345	1140	955	1475	42.6246	1787	1256	3.84584	2.72554
3210251	4914	1723	865	991	1335	37.7696	1386	2800	2.98345	6.07727
3210249	4912	1237	1355	1480	840	57.7158	1861	2039	4.00755	4.42736
3210247	4910	1508	983	1186	1233	44.1752	2875	98	6.19365	0.212878
3210245	4908	1325	1121	1038	1424	43.9894	1233	1368	2.65735	2.97281
3210241	4908	1626	941	819	1522	35.8598	856	1773	1.84484	3.85292
3210243	4908	1703	859	792	1554	33.639	652	734	1.40518	1.59506
3210231	4907	1677	905	960	1365	38.0069	1240	513	2.67298	1.11503
3210235	4907	1289	1152	1022	1444	44.3041	1221	1190	2.63203	2.58653
3210237	4907	1569	887	1008	1443	38.6183	908	1034	1.95731	2.24745
3210233	4907	1385	854	948	1720	36.723	27	3189	0.058202	6.93146
3210239	4907	1210	1205	1088	1404	46.7292	8	829	0.017245	1.80187
3210229	4906	1521	892	1030	1463	39.1765	103	757	0.222075	1.64571
3210227	4905	1620	1041	1073	1171	43.0989	1492	2252	3.21751	4.89683
3210223	4901	1422	1057	951	1471	40.9712	384	941	0.828776	2.04782
3210221	4901	1513	904	1004	1480	38.9308	374	787	0.807193	1.71268
3210219	4899	1487	931	964	1517	38.6814	2650	1992	5.72175	4.33678
3210217	4897	1587	1028	838	1444	38.105	1610	2697	3.47765	5.87404
3210215	4894	1352	1067	964	1511	41.4998	1111	2976	2.40127	6.48567
3210213	4891	1387	906	963	1635	38.213	1522	1586	3.2916	3.45853
3210207	4888	1446	940	1046	1456	40.6301	1730	1336	3.74374	2.91515
3210209	4888	1583	959	1019	1327	40.4664	477	2608	1.03223	5.69066
3210203	4882	1457	959	1113	1353	42.4416	7444	6445	16.1287	14.0803
3210201	4881	1318	1165	843	1555	41.1391	3423	5378	7.41803	11.7516
3210199	4874	1347	1006	959	1562	40.316	3	779	0.00651068	1.70466
3210195	4873	1621	860	1097	1295	40.1601	4823	3713	10.4691	8.1267
3210191	4869	1240	1261	1319	1049	52.9883	2675	2394	5.81132	5.24409
3210193	4869	1454	1074	1116	1225	44.9784	1337	858	2.90457	1.87946
3210189	4866	1433	1001	1213	1219	45.4994	3320	2005	7.21699	4.39469
3210187	4865	1393	971	1058	1443	41.7061	1076	786	2.33948	1.72316
3210185	4864	1451	923	1135	1355	42.3109	1668	2981	3.62738	6.53664
3210181	4862	1488	976	1047	1351	41.6084	1551	2476	3.37433	5.43152
3210183	4862	1558	875	862	1567	35.726	240	1439	0.52214	3.15669
3210179	4861	1194	1255	1156	1256	49.5988	4323	4733	9.40698	10.3848
3210177	4861	1462	1035	953	1411	40.8969	1273	1010	2.77009	2.21606
3210175	4860	1103	1231	1365	1161	53.4156	515	590	1.12089	1.2948
3210173	4859	1472	999	1213	1175	45.5238	1242	348	2.70374	0.763868
3210171	4858	1364	1103	825	1566	39.6871	1714	1401	3.73202	3.07586
3210169	4858	1436	889	896	1637	36.7435	853	1392	1.8573	3.0561
3210167	4857	1497	934	1057	1369	40.9924	368	5116	0.801438	11.2344
3210165	4856	1325	1184	1271	1076	50.556	985	656	2.1456	1.44082
3210161	4855	1345	958	1038	1514	41.1123	704	1348	1.53382	2.96133
3210163	4855	1304	946	1007	1598	40.2266	399	623	0.869309	1.36863
3210159	4854	1469	1002	786	1597	36.8356	2147	2493	4.67867	5.47783
3210157	4851	1683	881	1166	1121	42.1975	2540	1636	5.53851	3.59698
3210155	4851	1314	1043	928	1566	40.6308	1424	2560	3.10505	5.62853
3210151	4850	1334	1101	1110	1305	45.5876	4331	3167	9.44576	6.96454
3210153	4850	1327	1111	911	1501	41.6907	1154	1214	2.51683	2.6697
3210147	4849	1394	1117	936	1402	42.3386	3178	2395	6.93254	5.26792
3210149	4849	1201	1308	1231	1109	52.3613	2658	819	5.7982	1.80143
3210145	4848	1514	883	911	1540	37.005	1788	2112	3.90117	4.64641
3210143	4848	1365	974	1105	1404	42.8837	568	2403	1.2393	5.28661
3210141	4844	1565	1006	885	1388	39.038	677	4442	1.47834	9.78048
3210139	4843	1560	914	913	1456	37.7246	400	4548	0.873647	10.0159
3210137	4842	1542	888	910	1502	37.1334	12	2329	0.0262148	5.13016
3210135	4841	1231	1241	1109	1260	48.5437	1299	805	2.83834	1.77356
3210133	4840	1530	871	1046	1393	39.6074	265	514	0.57915	1.13267
3210131	4839	1182	1161	1156	1340	47.8818	934	441	2.04165	0.972006
3210129	4832	1721	887	958	1266	38.1829	2658	2608	5.8186	5.75661
3210127	4828	1563	930	1054	1281	41.0936	1166	2094	2.55459	4.62589
3210125	4828	1506	910	1018	1394	39.9337	948	1150	2.07698	2.54048
3210123	4826	1392	1140	1020	1274	44.7576	782	770	1.714	1.70172
3210121	4825	1283	1158	1084	1300	46.4663	306	527	0.670833	1.16493
3210117	4822	1263	1035	987	1537	41.9328	1039	382	2.27918	0.844933
3210119	4822	1504	862	872	1584	35.9602	783	558	1.71761	1.23422
3210115	4821	1535	889	947	1450	38.0834	1607	1720	3.52589	3.8052
3210113	4821	1495	991	994	1341	41.174	373	1267	0.818393	2.80302
3210111	4818	1369	929	1185	1335	43.8771	2996	10362	6.57757	22.9384
3210107	4817	1202	1240	1180	1195	50.2387	936	1111	2.05537	2.45993
3210109	4817	1401	911	1030	1475	40.2948	779	876	1.71061	1.93961
3210105	4816	1517	828	1054	1417	39.0781	4327	3251	9.50366	7.19973
3210103	4815	1301	1043	995	1476	42.3261	2672	499	5.8699	1.10533
3210101	4812	1382	1055	939	1436	41.4381	4741	4182	10.4216	9.26924
3210097	4812	1401	1126	912	1373	42.3525	870	683	1.91242	1.51384
3210099	4812	1408	1023	979	1402	41.6043	186	1419	0.408863	3.14516
3210095	4811	1246	1149	1165	1251	48.0981	2757	1478	6.06166	3.27661
3210093	4809	1434	1018	1116	1241	44.3751	1312	470	2.88582	1.04239
3210091	4808	1403	900	974	1531	38.9767	1143	1564	2.51462	3.46943
3210089	4806	1366	1051	929	1460	41.1985	1248	396	2.74676	0.878815
3210087	4803	1490	824	1002	1487	38.0179	924	1867	2.03493	4.14589
3210083	4802	1380	1084	972	1366	42.8155	1024	18798	2.25563	41.7518
3210085	4802	1341	988	892	1581	39.1504	461	503	1.01547	1.1172
3210081	4799	1540	901	954	1404	38.6539	352	640	0.775858	1.42238
3210079	4797	1443	886	1028	1440	39.8999	1457	356	3.21277	0.791528
3210075	4792	1410	997	1108	1277	43.9274	2001	743	4.41693	1.6537
3210077	4792	1383	812	943	1654	36.6235	1374	1465	3.03292	3.26067
3210073	4791	1440	965	877	1509	38.4471	301	824	0.664555	1.83437
3210071	4789	1426	912	1063	1388	41.2403	482	1149	1.06462	2.55895
3210069	4788	1327	1039	963	1459	41.8129	1644	1259	3.63194	2.80451
3210067	4787	1591	838	829	1529	34.8235	3212	2102	7.09745	4.68334
3210065	4786	1456	1023	904	1403	40.2633	3148	2419	6.95749	5.39075
3210061	4783	1520	865	947	1451	37.8842	5166	6021	11.4247	13.4262
3210059	4783	1542	869	1026	1346	39.6195	933	146	2.06334	0.325566
3210057	4782	1479	1059	937	1307	41.7399	607	1809	1.34267	4.03473
3210055	4780	1242	1085	910	1543	41.7364	3416	2070	7.55928	4.61879
3210053	4779	1477	820	876	1606	35.4886	1646	1053	3.6432	2.35005
3210049	4778	1436	911	1023	1408	40.4772	1536	1092	3.40044	2.4376
3210051	4778	1461	937	1017	1363	40.8958	931	1641	2.06108	3.6631
3210047	4777	1497	950	1108	1222	43.0814	882	562	1.95301	1.25478
3210045	4768	1050	1304	1372	1042	56.1242	837	592	1.85686	1.32425
3210043	4768	1533	826	889	1520	35.969	174	1321	0.386014	2.95497
3210041	4765	1637	804	1113	1211	40.2308	6904	5140	15.326	11.505
3210037	4757	1287	1240	1107	1123	49.3378	1447	1205	3.21755	2.70172
3210035	4756	1477	1080	950	1249	42.6829	1516	1664	3.37169	3.73162
3210033	4754	1506	921	945	1382	39.2512	2482	4155	5.52247	9.32176
3210031	4753	1586	915	859	1393	37.3238	520	474	1.15725	1.06364
3210029	4752	1288	968	1071	1425	42.9082	1477	1260	3.28772	2.828
3210027	4750	1396	950	950	1454	40	1433	954	3.19112	2.1421
3210025	4750	1479	895	1099	1277	41.9789	854	1580	1.90176	3.54772
3210023	4748	1256	1020	917	1555	40.7961	1129	962	2.51521	2.16098
3210021	4745	1552	852	880	1461	36.5016	2	1607	0.00445845	3.61215
3210017	4744	1478	837	997	1432	38.6594	1226	1633	2.73361	3.67136
3210019	4744	1497	986	920	1341	40.1771	16	955	0.0356751	2.14706
3210015	4743	1238	1198	1199	1108	50.5376	1646	1984	3.67085	4.46143
3210013	4736	1419	995	918	1404	40.3927	104	1444	0.23228	3.25193
3210011	4735	1435	920	955	1425	39.5987	186	1323	0.415512	2.98007
3210007	4734	1567	742	819	1606	32.9742	1450	1361	3.23989	3.06631
3210009	4734	1467	855	953	1459	38.1918	617	977	1.37863	2.20116
3210005	4731	1447	904	1005	1375	40.3509	1380	1298	3.08544	2.92622
3210003	4730	1153	1080	1058	1439	45.2008	1177	1760	2.63212	3.9686
3210001	4729	1507	940	835	1447	37.5344	1108	664	2.47834	1.49756
3209999	4728	1338	1107	1255	1028	49.9577	983	2364	2.19921	5.33281
3209995	4728	1411	1021	1043	1253	43.6548	802	969	1.79427	2.18591
3209997	4728	1306	995	867	1560	39.3824	583	553	1.30431	1.24748
3209993	4727	1805	809	983	1130	37.9099	461	703	1.03159	1.58619
3209991	4726	1493	990	870	1373	39.3567	1189	959	2.66121	2.16427
3209989	4721	1431	935	1047	1308	41.9826	1039	229	2.32794	0.517354
3209987	4718	1454	1002	1245	1017	47.6261	617	1519	1.3833	3.43389
3209985	4715	1190	1102	1144	1279	47.6352	98	2899	0.219854	6.55771
3209983	4713	1454	1072	1124	1063	46.5945	801	1888	1.79773	4.27258
3209981	4713	1363	924	1096	1330	42.8602	448	3028	1.00547	6.85243
3209979	4712	1390	988	983	1351	41.8294	569	102	1.27731	0.230877
3209975	4706	1356	1043	954	1353	42.4352	1560	1086	3.50641	2.4613
3209977	4706	1435	858	923	1490	37.8453	522	1265	1.1733	2.86698
3209973	4705	1471	843	934	1457	37.7683	1666	4130	3.74547	9.36217
3209971	4705	1504	939	852	1410	38.0659	446	818	1.00269	1.8543
3209969	4703	1473	919	1029	1282	41.4204	1004	904	2.25813	2.05012
3209967	4703	1427	922	988	1366	40.6124	295	1968	0.663495	4.46309
3209965	4702	1458	807	909	1528	36.4951	1500	2156	3.37442	4.89049
3209963	4701	1358	932	1122	1289	43.6928	927	1220	2.08583	2.76793
3209961	4698	1209	1325	1075	1089	51.0856	604	537	1.35992	1.21912
3209957	4697	1218	963	1069	1447	43.2617	1798	3816	4.04911	8.6651
3209959	4697	1336	941	987	1433	41.0475	1430	1170	3.22037	2.65675
3209955	4695	1359	1041	912	1383	41.5974	1221	911	2.75087	2.06952
3209953	4693	1410	834	981	1468	38.6746	5047	5685	11.3756	12.9201
3209951	4693	1414	978	990	1311	41.9348	1261	868	2.8422	1.97267
3209949	4692	1115	1232	1085	1260	49.3819	65	508	0.146536	1.15476
3209947	4691	1569	1011	881	1230	40.3326	810	928	1.82646	2.10993
3209945	4685	1059	1359	1288	979	56.4995	508	464	1.14695	1.05632
3209943	4684	1182	1124	1051	1327	46.4347	5499	6634	12.4182	15.1058
3209939	4683	1590	858	858	1377	36.6432	2047	1942	4.62364	4.42294
3209941	4683	1595	860	952	1276	38.6931	306	1056	0.691174	2.40506
3209937	4682	1302	1038	935	1407	42.1401	2027	1815	4.57944	4.13458
3209935	4682	1421	891	946	1424	39.2354	1936	4273	4.37385	9.73391
3209933	4680	1303	1070	861	1446	41.2607	2521	2184	5.69793	4.97729
3209931	4677	1436	750	911	1580	35.5142	2571	3187	5.81467	7.26776
3209929	4676	1266	1025	1105	1280	45.5518	206	485	0.465997	1.10625
3209925	4676	1025	1107	1215	1329	49.6578	48	502	0.108582	1.14503
3209923	4674	1422	790	951	1511	37.2486	556	1854	1.25828	4.23065
3209917	4673	1406	966	850	1451	38.8615	1633	1963	3.69642	4.48033
3209921	4673	1389	953	1159	1172	45.1958	0	3277	0	7.4794
3209915	4672	1358	1043	839	1432	40.2825	1918	230	4.34246	0.525062
3209913	4670	1389	910	979	1392	40.4497	144	1554	0.326164	3.54912
3209911	4668	1269	929	961	1509	40.4884	2052	1348	4.64983	3.07996
3209909	4664	1386	932	925	1421	39.8156	619	540	1.40386	1.23487
3209905	4663	1407	712	856	1688	33.6264	1603	1603	3.63629	3.66652
3209907	4663	1336	953	1096	1278	43.9417	1078	1479	2.44537	3.3829
3209899	4659	1460	919	813	1467	37.1754	1266	1173	2.8743	2.68529
3209903	4659	1599	788	859	1413	35.3509	1205	112	2.7358	0.256396
3209897	4658	1720	775	939	1224	36.7969	638	747	1.44881	1.71044
3209895	4654	1320	1133	1173	1028	49.5488	756	1323	1.71825	3.03193
3209891	4651	1293	974	1033	1351	43.152	1439	1034	3.27269	2.37116
3209889	4650	1467	1066	992	1125	44.2581	1045	367	2.37713	0.841781
3209883	4648	1649	783	960	1256	37.5	1366	1488	3.10867	3.41447
3209879	4647	1542	868	838	1399	36.7119	1818	237	4.1382	0.543953
3209881	4647	1276	905	1027	1439	41.5752	715	547	1.62751	1.25545
3209875	4646	1142	1110	1218	1176	50.1076	1304	1394	2.96885	3.20014
3209877	4646	1503	752	942	1449	36.4615	718	1245	1.63469	2.85809
3209873	4645	1554	916	752	1423	35.9096	2736	1902	6.23047	4.36728
3209871	4641	1354	985	859	1443	39.7328	554	1301	1.26267	2.98987
3209865	4639	916	1338	1164	1221	53.934	1283	1153	2.92545	2.65088
3209869	4639	1454	953	919	1313	40.3535	1222	5271	2.78636	12.1187
3209867	4639	1299	976	1052	1312	43.7163	879	1050	2.00426	2.41408
3209863	4638	1468	943	926	1301	40.2975	4222	2095	9.62893	4.81769
3209861	4637	1616	804	777	1440	34.0953	1845	842	4.20872	1.93669
3209859	4636	1288	1018	957	1373	42.6014	564	468	1.28684	1.07668
3209857	4636	1403	835	867	1531	36.7127	146	973	0.333119	2.23849
3209855	4635	1232	1102	948	1353	44.2287	1206	1030	2.75225	2.37014
3209853	4634	1339	1174	1135	986	49.8274	253	474	0.577504	1.09096
3209851	4633	1186	1046	909	1492	42.1973	193	971	0.440642	2.23534
3209845	4631	1344	972	973	1342	41.9996	2062	2172	4.70982	5.00231
3209849	4631	1408	985	1087	1151	44.742	967	648	2.20873	1.4924
3209843	4630	1565	843	1031	1191	40.4752	1750	211	3.99804	0.486057
3209841	4628	1264	990	852	1522	39.8012	1859	1652	4.2489	3.80717
3209839	4627	1647	975	1039	966	43.5271	2058	2059	4.70475	4.74616
3209835	4626	1260	1087	918	1361	43.342	2668	661	6.10057	1.52399
3209837	4626	1450	773	825	1578	34.5439	979	168	2.23855	0.387338
3209833	4624	1561	1017	900	1146	41.4576	759	1251	1.73626	2.88553
3209831	4624	1489	943	933	1259	40.5709	197	495	0.450649	1.14176
3209829	4623	1393	984	1045	1201	43.8892	511	1421	1.1692	3.27836
3209825	4622	1349	952	884	1437	39.7231	1879	2281	4.30019	5.26358
3209827	4622	1279	925	997	1421	41.5837	1597	16150	3.65481	37.2674
3209823	4621	1504	948	811	1358	38.0654	640	597	1.46499	1.37792
3209821	4620	1339	971	959	1351	41.7749	3124	1153	7.15253	2.66179
3209819	4618	1350	838	997	1433	39.7358	1045	1037	2.39361	2.39503
3209817	4617	1519	910	822	1366	37.5135	3698	1368	8.47222	3.16018
3209815	4612	1380	981	922	1329	41.2619	3137	718	7.19475	1.66043
3209813	4612	1370	995	922	1325	41.5655	1049	1718	2.40589	3.97301
3209811	4611	1443	905	760	1503	36.1093	6755	6050	15.496	13.9941
3209809	4610	1236	905	962	1507	40.4989	1217	1815	2.79242	4.19915
3209805	4609	1244	1061	973	1331	44.131	1341	1654	3.0776	3.8275
3209801	4605	1214	1056	819	1516	40.7166	1309	160	3.00677	0.370575
3209803	4605	1238	960	1119	1288	45.1466	576	547	1.32307	1.2669
3209799	4605	1475	836	934	1360	38.4365	223	601	0.512231	1.39197
3209795	4603	1182	1025	895	1501	41.7119	1523	211	3.49985	0.488908
3209791	4602	1411	984	792	1415	38.5919	3577	2854	8.22172	6.61444
3209789	4602	1412	903	778	1509	36.5276	2216	1699	5.09347	3.93761
3209787	4599	1565	726	949	1359	36.421	158	1143	0.363399	2.65075
3209785	4598	1583	853	954	1208	39.2997	257	485	0.591227	1.12502
3209783	4595	1511	804	954	1326	38.259	1	1259	0.002302	2.92231
3209781	4594	1408	819	995	1372	39.4863	1472	1530	3.38928	3.55211
3209779	4592	1125	1116	1024	1327	46.6028	14218	7777	32.7512	18.0633
3209777	4592	1526	838	796	1432	35.5836	153	1092	0.352436	2.53634
3209775	4591	1396	975	825	1395	39.2071	3641	3550	8.38888	8.24721
3209773	4590	1258	1056	1012	1264	45.0545	1999	342	4.60671	0.794693
3209771	4589	1104	1163	1043	1279	48.0715	2779	1965	6.40562	4.56699
3209769	4588	1410	1017	994	1167	43.8317	894	976	2.06113	2.26888
3209767	4587	1415	791	803	1578	34.7504	489	281	1.12764	0.653377
3209759	4586	1113	1083	937	1453	44.0471	1522	1381	3.51052	3.21178
3209755	4585	1494	949	779	1363	37.6881	837	1179	1.93097	2.74259
3209753	4584	1414	975	865	1330	40.1396	1429	2123	3.29745	4.93959
3209751	4584	1165	1067	892	1460	42.7356	713	2019	1.64526	4.69762
3209749	4583	1750	774	1009	1050	38.9046	295	904	0.680867	2.1038
3209747	4582	1542	856	733	1451	34.6792	1171	1172	2.70329	2.72809
3209745	4580	1005	1160	809	1606	42.9913	4663	18972	10.7694	44.1808
3209743	4579	1425	767	842	1545	35.1387	9604	6952	22.1856	16.1929
3209739	4577	1351	817	882	1527	37.1204	3349	1293	7.73971	3.01303
3209737	4576	1358	931	844	1443	38.7893	718	1340	1.6597	3.12324
3209735	4574	1221	987	1109	1257	45.8242	1801	1059	4.16493	2.46937
3209733	4573	1216	994	825	1538	39.777	2798	468	6.47198	1.09152
3209731	4570	1461	882	736	1491	35.4048	1692	1540	3.91629	3.5941
3209729	4569	1453	796	962	1358	38.4767	4921	10262	11.3926	23.955
3209727	4569	1348	983	841	1397	39.9212	1577	736	3.65091	1.71808
3209723	4567	1323	1060	934	1250	43.661	4210	2677	9.75083	6.25177
3209725	4567	1044	1087	1078	1358	47.4053	1666	2691	3.85864	6.28447
3209715	4566	1014	1207	981	1364	47.9194	2326	4143	5.38845	9.67754
3209713	4566	1163	1008	850	1545	40.6921	1857	2259	4.30196	5.27675
3209719	4566	1294	939	1096	1237	44.5686	1408	1252	3.2618	2.92452
3209717	4566	1590	855	756	1365	35.2825	1299	1745	3.00929	4.07611
3209711	4565	1429	900	1000	1236	41.621	199	510	0.461108	1.19156
3209709	4563	1308	990	887	1378	41.1352	3491	3207	8.09263	7.49608
3209705	4562	1379	870	1005	1308	41.1004	4000	302	9.2746	0.706054
3209707	4562	1484	929	911	1238	40.3332	15	481	0.0347797	1.12454
3209703	4561	980	1056	724	1801	39.0265	670	1116	1.55384	2.6097
3209701	4555	1604	818	807	1326	35.6751	243	629	0.564298	1.47282
3209699	4554	1520	862	829	1343	37.1322	867	815	2.0138	1.90876
3209697	4553	1428	965	1020	1140	43.5976	2930	5050	6.80707	11.8299
3209695	4553	1160	968	903	1522	41.0938	446	762	1.03616	1.78502
3209693	4550	1402	893	1040	1215	42.4835	473	692	1.09961	1.62211
3209691	4549	1272	831	959	1487	39.3493	2018	1496	4.69241	3.50753
3209687	4549	1422	897	1024	1206	42.2291	1708	439	3.97157	1.02928
3209689	4549	1022	1063	856	1608	42.1851	281	1886	0.653402	4.42193
3209683	4547	1344	878	941	1384	40.0044	7781	8016	18.1009	18.8026
3209685	4547	1290	924	900	1433	40.1144	430	1075	1.00031	2.52156
3209681	4546	1473	826	761	1486	34.9098	1113	1166	2.58974	2.73562
3209677	4542	1294	876	987	1385	41.0172	2491	2989	5.80119	7.01883
3209679	4542	1413	898	807	1424	37.5385	2139	3379	4.98143	7.93464
3209675	4539	1370	991	840	1338	40.3393	1956	2408	4.55826	5.65825
3209673	4539	1016	1161	1113	1249	50.0991	1042	3760	2.42828	8.83514
3209671	4538	1431	923	900	1284	40.1719	2695	675	6.28181	1.58645
3209669	4538	1364	923	884	1367	39.8193	1248	979	2.90898	2.30093
3209665	4537	1473	878	835	1351	37.7562	1709	1840	3.98441	4.32549
3209667	4537	1022	1248	1285	982	55.8298	1070	761	2.49463	1.78896
3209663	4536	1518	901	865	1252	38.933	1396	1284	3.25539	3.0191
3209661	4536	1297	961	1121	1157	45.8995	82	1923	0.191219	4.5216
3209659	4532	1147	1190	886	1309	45.8076	848	1279	1.97923	3.01
3209657	4531	1374	858	921	1378	39.2629	1589	309	3.70954	0.727362
3209655	4531	1297	992	895	1347	41.6464	206	1324	0.48091	3.11659
3209651	4530	1218	1042	1022	1248	45.5629	1325	1163	3.09391	2.73821
3209653	4530	1312	878	1099	1241	43.6424	1013	949	2.36538	2.23436
3209649	4529	1227	953	958	1391	42.1947	2120	358	4.95135	0.843076
3209647	4528	1608	818	891	1211	37.7429	1	541	0.00233606	1.27432
3209645	4526	1364	961	843	1358	39.8586	1347	1252	3.14806	2.95036
3209643	4525	1270	957	857	1441	40.0884	582	1583	1.36049	3.7312
3209641	4524	1014	1057	1071	1382	47.038	771	976	1.80269	2.30098
3209637	4522	1340	939	817	1426	38.8324	8841	6425	20.6805	15.154
3209635	4520	1255	813	847	1605	36.7257	2533	1819	5.92771	4.2922
3209629	4519	1304	982	1116	1117	46.4262	1446	1553	3.38467	3.66535
3209633	4519	985	1248	1111	1175	52.2018	895	752	2.09494	1.77485
3209631	4519	1150	973	913	1483	41.7349	133	761	0.311315	1.79609
3209623	4515	1310	898	891	1416	39.6235	1108	964	2.59581	2.27722
3209619	4513	1554	811	900	1248	37.9127	3263	2348	7.6479	5.54905
3209621	4513	1343	936	855	1379	39.6854	2885	1709	6.76193	4.0389
3209617	4512	1447	844	969	1252	40.1817	638	683	1.49569	1.6145
3209613	4511	1432	850	864	1365	37.996	3189	1259	7.47777	2.97673
3209611	4511	1441	737	863	1470	35.4689	1224	2673	2.87011	6.31993
3209609	4511	1340	819	951	1401	39.2374	173	579	0.405661	1.36896
3209607	4510	1450	934	1127	999	45.6984	980	1376	2.29848	3.25408
3209605	4509	1405	952	893	1259	40.9182	819	9458	1.9213	22.372
3209603	4506	1399	880	861	1366	38.6374	1794	1382	4.21135	3.27117
3209601	4505	1294	1029	944	1238	43.7958	1864	2622	4.37665	6.2076
3209599	4503	1280	989	942	1292	42.8825	1445	1245	3.39435	2.94885
3209597	4503	1449	655	936	1463	35.332	497	374	1.16747	0.885841
3209595	4500	1169	963	867	1501	40.6667	2991	791	7.03063	1.87478
3209591	4499	1271	975	871	1382	41.0313	3093	419	7.27201	0.993308
3209589	4499	1284	899	1000	1316	42.2094	2552	2953	6.00005	7.00057
3209593	4499	1581	735	918	1265	36.7415	12	2147	0.0282134	5.08982
3209587	4498	1218	833	902	1545	38.5727	370	461	0.870107	1.09312
3209583	4496	1445	880	965	1206	41.0365	4659	6719	10.9612	15.9391
3209581	4496	1337	808	917	1434	38.3674	1640	1925	3.85841	4.56657
3209575	4495	1402	702	849	1542	34.505	1683	2046	3.96045	4.85469
3209579	4495	835	1312	1326	1022	58.6874	309	1066	0.727142	2.52938
3209571	4494	1159	957	805	1573	39.2078	2207	2437	5.19469	5.78374
3209573	4494	1411	917	926	1240	41.0102	1111	1323	2.615	3.13988
3209569	4493	1161	913	1082	1337	44.4024	3	1829	0.00706277	4.34173
3209561	4490	1305	889	867	1429	39.1091	478	329	1.12609	0.781512
3209563	4490	1469	833	936	1252	39.3987	321	508	0.756222	1.20671
3209565	4490	1280	967	902	1341	41.6258	150	1239	0.353375	2.94314
3209559	4489	1205	1076	924	1284	44.5534	97	522	0.228566	1.24024
3209557	4487	1486	914	826	1261	38.7787	568	1328	1.33901	3.15666
3209555	4487	1050	1069	1073	1295	47.7379	455	890	1.07262	2.11553
3209553	4486	1168	1050	1063	1205	47.1021	371	422	0.874792	1.00332
3209549	4484	1094	1104	1227	1059	51.9848	1700	1881	4.01027	4.47414
3209551	4484	1556	868	738	1322	35.8162	50	2042	0.117949	4.85709
3209547	4483	1566	830	1036	1051	41.6239	889	1460	2.0976	3.47352
3209543	4479	1294	824	909	1452	38.6917	1043	728	2.46317	1.73355
3209545	4479	1219	900	870	1490	39.5177	359	1279	0.84782	3.04562
3209541	4476	1493	815	986	1182	40.2368	1096	1604	2.59007	3.82208
3209537	4475	1389	932	794	1360	38.5698	1549	2570	3.66141	6.12528
3209533	4474	1296	870	886	1422	39.249	5272	1031	12.4644	2.45781
3209535	4474	1461	843	951	1219	40.0983	296	511	0.69982	1.21818
3209531	4469	1535	801	776	1357	35.2875	1341	121	3.17401	0.288776
3209529	4468	1311	825	994	1338	40.7117	1890	1199	4.47444	2.86215
3209527	4468	1153	1048	1013	1254	46.128	1217	1933	2.88116	4.61429
3209525	4467	1271	1005	896	1295	42.5565	999	772	2.36559	1.84326
3209523	4466	1500	919	1255	792	48.6789	1113	2053	2.63613	4.90294
3209521	4465	1229	929	1123	1184	45.9574	467	1219	1.10633	2.91184
3209519	4464	1549	787	774	1354	34.9686	3296	6186	7.81004	14.7799
3209515	4462	1217	849	830	1566	37.6289	3877	622	9.19087	1.48678
3209513	4460	1522	760	972	1206	38.8341	1327	2886	3.14722	6.90156
3209511	4459	1383	1000	988	1088	44.584	468	3766	1.11019	9.00801
3209507	4458	1443	832	983	1200	40.7133	1066	532	2.52934	1.27279
3209509	4458	1247	901	909	1401	40.6012	419	1024	0.994178	2.44989
3209505	4457	1384	863	855	1355	38.5461	3812	4342	9.04692	10.3904
3209503	4454	1205	1035	1078	1136	47.4405	462	1855	1.09719	4.44201
3209501	4453	1605	781	1113	954	42.5331	473	1068	1.12357	2.55802
3209499	4451	1582	725	683	1461	31.6333	5260	1264	12.5002	3.02883
3209497	4450	1035	1187	1276	952	55.3483	713	1052	1.69481	2.5214
3209495	4448	1167	1122	1070	1089	49.2806	1349	1620	3.20802	3.88451
3209493	4448	1116	1090	991	1251	46.7851	1085	507	2.58021	1.21571
3209491	4448	1309	928	778	1433	38.3543	1	489	0.00237808	1.17255
3209489	4446	1298	884	916	1348	40.4858	1160	2839	2.75981	6.81055
3209485	4442	1253	1014	1139	1036	48.4692	1825	1744	4.34585	4.18749
3209487	4442	1504	845	1132	961	44.507	1452	822	3.45763	1.97369
3209481	4435	1315	789	854	1477	37.0462	4790	7872	11.4244	18.9312
3209483	4435	1547	785	738	1365	34.3405	1130	1646	2.6951	3.95842
3209477	4433	1473	829	764	1367	35.935	725	1230	1.72994	2.95933
3209473	4431	1480	808	720	1423	34.4843	744	1403	1.77608	3.37708
3209469	4430	1354	851	1001	1224	41.8059	522	343	1.2464	0.825803
3209467	4430	1429	721	901	1379	36.614	266	1620	0.635138	3.90029
3209465	4429	1266	1021	944	1198	44.3667	1385	1078	3.30776	2.59597
3209463	4428	1326	989	839	1274	41.2827	3933	6355	9.39522	15.3071
3209461	4427	1411	929	925	1162	41.8794	1118	2056	2.6713	4.95336
3209459	4426	1441	689	767	1529	32.8965	2429	2708	5.80506	6.52564
3209455	4425	1439	858	804	1324	37.5593	4293	242	10.2621	0.583295
3209457	4425	1465	815	825	1320	37.0621	85	1976	0.203187	4.76277
3209453	4424	1177	1125	892	1230	45.5922	834	1870	1.99407	4.5083
3209451	4423	1329	920	813	1361	39.1816	229	1285	0.547657	3.09865
3209449	4419	1332	842	856	1389	38.425	1698	3149	4.06447	7.60037
3209447	4418	931	1051	1175	1261	50.3848	1683	134	4.02948	0.323493
3209443	4418	1187	967	805	1459	40.1086	1130	950	2.70547	2.29342
3209445	4418	1377	894	761	1386	37.4604	360	1322	0.86192	3.19148
3209441	4415	969	967	1125	1354	47.3839	2446	2349	5.86025	5.67464
3209439	4411	1151	1161	962	1137	48.1297	1080	4836	2.58986	11.6932
3209437	4409	1285	787	974	1363	39.941	677	774	1.6242	1.87235
3209435	4409	1127	885	1003	1394	42.8215	243	1423	0.582984	3.44232
3209433	4408	1321	884	830	1373	38.8838	8	880	0.0191972	2.12925
3209431	4407	1348	1017	832	1210	41.956	2731	4338	6.55495	10.4986
3209429	4406	1283	889	933	1301	41.3527	994	1091	2.38634	2.64099
3209427	4404	1187	1148	1118	951	51.4532	573	1129	1.37625	2.73421
3209423	4401	1388	796	876	1341	37.9914	168	1273	0.403783	3.08506
3209421	4400	1449	852	795	1304	37.4318	1343	2136	3.2286	5.17767
3209419	4399	1253	832	917	1397	39.759	2461	1182	5.91763	2.86582
3209417	4399	1317	958	805	1319	40.0773	1182	1062	2.8422	2.57488
3209415	4398	1337	818	885	1358	38.7221	872	918	2.09726	2.22625
3209413	4396	836	1382	1296	882	60.919	5209	1128	12.5339	2.73676
3209411	4396	1361	951	809	1275	40.0364	2378	2042	5.72196	4.95432
3209409	4392	1438	865	1007	1082	42.623	1548	1097	3.7282	2.66398
3209405	4392	1347	853	810	1382	37.8643	1017	1120	2.44934	2.71983
3209407	4392	1453	850	755	1334	36.5437	416	873	1.00189	2.12001
3209403	4389	1298	849	898	1344	39.8041	4179	3807	10.0716	9.25131
3209401	4388	1349	884	779	1376	37.8988	366	598	0.882277	1.45352
3209399	4388	1373	843	958	1214	41.0438	5	706	0.012053	1.71603
3209395	4384	1344	855	976	1209	41.7655	375	1159	0.904797	2.81967
3209397	4384	1360	935	724	1365	37.8422	23	1388	0.0554942	3.3768
3209389	4377	1349	752	764	1512	34.6356	1254	5528	3.03048	13.4703
3209385	4374	1220	894	976	1284	42.7526	5233	1533	12.655	3.73809
3209381	4374	1372	840	874	1288	39.1861	115	803	0.278105	1.95805
3209377	4372	1241	992	676	1463	38.1519	6027	8162	14.5818	19.9114
3209379	4372	1359	800	788	1425	36.322	4154	8943	10.0502	21.8167
3209375	4367	1163	877	943	1384	41.6762	1871	1214	4.53191	2.96498
3209369	4362	1278	972	1079	1033	47.0197	3371	4087	8.17454	9.99321
3209371	4362	1167	975	854	1366	41.9303	952	621	2.30856	1.51842
3209365	4361	1373	819	853	1316	38.3398	2434	757	5.90371	1.85138
3209367	4361	1184	916	995	1266	43.8202	439	1175	1.0648	2.87368
3209363	4360	1336	835	839	1350	38.3945	279	452	0.676874	1.1057
3209361	4359	1401	893	777	1288	38.3115	1450	1046	3.51861	2.55936
3209359	4359	1109	1106	1004	1140	48.4056	1058	3553	2.56737	8.69349
3209357	4358	1341	911	848	1258	40.3626	2371	294	5.75486	0.719525
3209355	4354	1345	810	955	1244	40.5374	1162	1041	2.82298	2.55005
3209353	4353	1250	780	982	1341	40.4778	1803	1364	4.38124	3.34204
3209349	4352	1234	1008	946	1164	44.8989	1544	416	3.75274	1.01951
3209345	4350	1429	744	722	1455	33.7011	1	611	0.00243165	1.49809
3209339	4348	1090	1096	884	1278	45.5382	2042	3464	4.96771	8.49717
3209343	4348	1436	928	907	1077	42.2033	1077	617	2.62009	1.5135
3209341	4348	994	1237	1071	1046	53.0819	79	1475	0.192189	3.61817
3209337	4347	1428	811	733	1375	35.5187	2536	1976	6.17092	4.84823
3209335	4347	1375	833	976	1163	41.6149	2337	2767	5.68669	6.78899
3209331	4346	1048	1107	954	1237	47.4229	3166	954	7.70569	2.34123
3209327	4346	1461	842	783	1260	37.3907	1752	491	4.26417	1.20497
3209329	4346	1102	1028	1097	1119	48.8955	202	582	0.491645	1.4283
3209325	4344	1348	787	786	1423	36.2109	1813	1894	4.41467	4.65025
3209321	4342	1269	852	898	1323	40.304	1888	1087	4.59941	2.67009
3209319	4342	1297	784	802	1459	36.5269	1455	7194	3.54457	17.6712
3209323	4342	1448	865	792	1237	38.1621	1428	1438	3.47879	3.53228
3209313	4340	1371	840	969	1160	41.682	126	3008	0.307094	7.39221
3209311	4339	986	1207	1361	785	59.1841	1031	843	2.51339	2.07216
3209309	4338	1489	778	862	1209	37.8054	433	1067	1.05582	2.62338
3209303	4337	933	1239	1040	1125	52.5478	3680	2664	8.9753	6.55135
3209299	4336	1192	1056	872	1216	44.4649	1611	872	3.93004	2.14493
3209297	4336	1209	956	926	1245	43.4041	1225	1369	2.98839	3.36744
3209301	4336	1362	967	755	1252	39.714	1178	952	2.87373	2.34171
3209295	4333	1369	794	804	1366	36.8798	543	704	1.32557	1.73289
3209291	4330	1269	863	1049	1149	44.157	764	1298	1.86636	3.19722
3209293	4330	1231	916	964	1219	43.418	217	545	0.530105	1.34244
3209287	4328	1323	844	771	1390	37.3152	4571	3008	11.1716	7.4127
3209289	4328	1296	744	828	1460	36.3216	2063	2125	5.04199	5.2367
3209285	4328	1182	1014	902	1230	44.2699	1177	982	2.8766	2.41997
3209283	4326	1319	930	824	1253	40.5455	1140	2025	2.78746	4.99257
3209281	4324	1290	802	896	1336	39.2692	2846	243	6.96209	0.599386
3209279	4324	1173	1138	887	1126	46.8316	904	1622	2.21143	4.00084
3209277	4324	1316	744	819	1445	36.1471	451	554	1.10327	1.3665
3209275	4323	1379	708	839	1397	35.7853	2505	901	6.12933	2.22293
3209273	4321	1419	918	940	1044	42.9993	358	635	0.876373	1.56738
3209271	4320	1158	1015	1019	1128	47.0833	1292	1311	3.16351	3.23672
3209269	4318	1113	868	955	1382	42.2186	3392	1882	8.30928	4.64861
3209263	4317	1377	747	907	1286	38.3136	2622	2951	6.42453	7.29077
3209261	4317	1367	943	864	1143	41.8578	1016	1679	2.48944	4.14815
3209265	4317	1216	947	875	1279	42.2052	397	1172	0.972745	2.89555
3209257	4313	1313	881	992	1127	43.4268	3106	5515	7.6175	13.638
3209255	4311	1156	991	909	1255	44.0733	1345	3088	3.30016	7.63986
3209253	4310	1500	775	666	1369	33.4339	2220	1869	5.44836	4.62507
3209249	4310	891	976	875	1568	42.9466	1606	2089	3.94147	5.16948
3209245	4308	1237	834	1026	1211	43.1755	1368	4310	3.35893	10.6706
3209247	4308	1235	911	1129	1033	47.3538	820	939	2.01339	2.32475
3209243	4306	1485	717	738	1366	33.7901	663	846	1.62866	2.09547
3209241	4303	1297	725	938	1343	38.6475	3536	11994	8.69223	29.7289
3209239	4302	1423	721	703	1455	33.1009	787	1577	1.93506	3.90973
3209235	4300	1093	963	882	1362	42.907	920	671	2.26313	1.66433
3209237	4300	1411	797	934	1158	40.2558	585	2151	1.43906	5.33529
3209233	4299	1257	1044	1009	989	47.7553	1483	3006	3.64892	7.45774
3209229	4297	1169	1019	824	1285	42.8904	1488	438	3.66292	1.08716
3209231	4297	1351	1032	980	934	46.8234	568	613	1.39821	1.52153
3209227	4295	1131	990	1015	1159	46.6822	2032	23	5.00439	0.0571151
3209225	4294	1295	813	981	1205	41.7792	284	1135	0.699595	2.81916
3209221	4292	1236	1032	834	1190	43.4762	22	848	0.0542192	2.10728
3209215	4287	1262	778	880	1367	38.6751	2138	1903	5.27527	4.73447
3209217	4287	1273	922	794	1298	40.028	1260	4613	3.10891	11.4767
3209219	4287	1451	868	885	1083	40.8911	516	393	1.27317	0.977744
3209213	4284	1398	790	734	1362	35.5742	2221	2037	5.4839	5.0714
3209211	4282	1156	964	841	1321	42.1532	1476	1407	3.64611	3.50456
3209209	4282	1237	904	784	1357	39.4208	657	821	1.62296	2.04495
3209207	4281	1223	986	974	1098	45.7837	1003	77	2.47826	0.191837
3209205	4277	1125	905	853	1394	41.1036	2122	1919	5.24803	4.78544
3209199	4276	1303	952	913	1108	43.6155	2601	2775	6.43418	6.92168
3209201	4276	1102	871	825	1478	39.6632	2121	1993	5.24679	4.97113
3209197	4276	1365	879	848	1184	40.3882	784	436	1.93941	1.08751
3209203	4276	1207	823	862	1384	39.406	766	1278	1.89488	3.18771
3209195	4275	1348	914	840	1173	41.0292	715	465	1.76913	1.16012
3209187	4274	1201	804	894	1375	39.7286	21879	23875	54.1481	59.5792
3209189	4274	1067	1150	1080	977	52.1759	1612	96	3.98952	0.239565
3209193	4274	1562	698	1031	983	40.4539	772	1248	1.91062	3.11434
3209191	4274	1164	837	854	1419	39.5648	569	623	1.40821	1.55467
3209185	4271	1212	898	748	1413	38.539	37628	20025	93.1906	50.0068
3209179	4268	1435	850	763	1220	37.7929	1516	1403	3.75721	3.50606
3209183	4268	1151	971	860	1286	42.9007	1148	2326	2.84517	5.81261
3209175	4267	1495	823	886	1063	40.0516	1511	2143	3.74569	5.35655
3209173	4267	1464	842	821	1140	38.9735	607	655	1.50472	1.63721
3209169	4264	1187	994	796	1287	41.9794	490	841	1.21554	2.10361
3209167	4264	1377	824	793	1270	37.9221	7	1376	0.0173649	3.44181
3209163	4263	1267	754	939	1303	39.7138	14545	1291	36.0902	3.22996
3209161	4263	1026	946	1013	1278	45.9536	2058	1795	5.10647	4.49092
3209165	4263	1411	690	880	1282	36.8285	1452	2273	3.60281	5.68683
3209157	4261	1081	983	758	1439	40.859	1668	137	4.14071	0.342922
3209159	4261	985	1207	1186	883	56.1605	92	1008	0.228385	2.5231
3209155	4259	1340	867	827	1225	39.7746	1617	496	4.01599	1.24211
3209153	4258	1383	761	961	1153	40.4415	3709	2914	9.21386	7.29911
3209151	4258	1348	814	857	1239	39.2438	452	86	1.12285	0.215416
3209149	4257	1514	731	614	1398	31.595	1127	1415	2.80034	3.54518
3209145	4249	1243	704	788	1514	35.1141	1524	1107	3.79392	2.77873
3209147	4249	782	1248	1293	926	59.8023	847	1649	2.10857	4.13923
3209143	4248	731	1399	925	1193	54.7081	526	40	1.30976	0.10043
3209141	4247	1099	953	843	1352	42.2887	1667	1167	4.15187	2.93072
3209139	4246	1309	845	835	1257	39.5667	2635	93160	6.56434	234.011
3209135	4246	1167	855	924	1300	41.8983	1587	1160	3.95355	2.91383
3209137	4246	1114	795	934	1403	40.7207	415	494	1.03385	1.24089
3209131	4244	1285	868	777	1314	38.7606	1	2030	0.00249238	5.1016
3209125	4242	1088	959	833	1362	42.2442	4149	2715	10.3458	6.8263
3209127	4242	1097	960	795	1390	41.372	927	724	2.31153	1.82035
3209123	4241	1319	835	731	1356	36.9253	3605	3720	8.9914	9.35536
3209119	4240	1218	896	1050	1076	45.8962	918	259	2.29017	0.651508
3209121	4240	1270	750	867	1353	38.1368	816	1488	2.0357	3.74303
3209117	4239	1308	680	752	1499	33.7816	1536	1442	3.83282	3.62817
3209113	4238	1381	702	851	1304	36.6446	1927	593	4.80962	1.49238
3209115	4238	1085	1023	1050	1080	48.9146	1550	2363	3.86867	5.94687
3209111	4237	1176	915	839	1307	41.3972	1294	745	3.23047	1.87536
3209109	4235	1287	834	829	1285	39.268	1236	2553	3.08713	6.42959
3209107	4234	1269	912	874	1179	42.1823	1158	1815	2.893	4.57206
3209103	4233	1005	1229	980	1019	52.1852	802	677	2.00409	1.70579
3209101	4232	1051	1080	1022	1079	49.6692	774	871	1.93458	2.19512
3209097	4230	1396	862	863	1109	40.7801	1392	721	3.48088	1.81795
3209099	4230	1242	946	717	1325	39.3144	801	3162	2.00301	7.97274
3209093	4229	1270	897	821	1241	40.6243	1490	1646	3.72682	4.15124
3209091	4228	1371	728	843	1286	37.157	1215	5890	3.03971	14.8582
3209089	4228	1401	745	755	1327	35.4778	14	844	0.0350254	2.12909
3209085	4226	1263	826	1020	1117	43.682	1475	1504	3.69193	3.79581
3209083	4226	1147	1049	1065	965	50.0237	809	577	2.02493	1.45624
3209079	4223	1276	792	886	1269	39.7348	42	1793	0.105201	4.5284
3209075	4222	1131	911	944	1236	43.9365	1032	596	2.58554	1.50562
3209073	4222	1228	881	810	1303	40.0521	786	906	1.96922	2.28874
3209071	4220	1239	848	939	1194	42.346	958	276	2.40128	0.697562
3209069	4220	1126	957	789	1348	41.3744	298	869	0.746955	2.19631
3209067	4219	1158	970	893	1198	44.1574	15	1220	0.0376073	3.08416
3209065	4218	1482	777	997	962	42.0578	2697	2271	6.7634	5.74244
3209063	4218	1408	762	638	1410	33.1911	9	544	0.0225697	1.37556
3209061	4216	1219	951	858	1188	42.908	246	642	0.617199	1.62413
3209059	4215	1436	825	693	1261	36.0142	330	845	0.828146	2.13818
3209055	4213	1086	982	972	1173	46.3803	259	1743	0.650277	4.41257
3209057	4213	1315	916	892	1090	42.9148	225	3745	0.564913	9.48083
3209053	4212	1388	702	723	1399	33.8319	91	490	0.22853	1.24078
3209051	4210	1297	815	783	1315	37.9572	984	1775	2.47231	4.49679
3209049	4209	1120	935	779	1375	40.7223	942	952	2.36735	2.41237
3209047	4209	1445	747	686	1331	34.0461	907	3935	2.27939	9.9713
3209045	4208	1399	773	842	1194	38.3793	1220	194	3.06672	0.491713
3209039	4203	1279	885	1049	990	46.0148	576	940	1.44962	2.38536
3209037	4202	1138	974	884	1206	44.217	1330	1811	3.348	4.59672
3209033	4202	1325	869	898	1110	42.0514	958	2230	2.41157	5.66024
3209035	4202	1399	726	858	1219	37.6963	692	58	1.74197	0.147217
3209029	4199	1260	809	736	1394	36.7945	4468	5247	11.2553	13.3276
3209031	4199	1280	865	731	1323	38.009	1431	966	3.60482	2.45368
3209027	4197	1092	918	1094	1093	47.939	914	1058	2.30355	2.68864
3209025	4196	1098	943	893	1262	43.756	895	941	2.2562	2.39188
3209023	4194	1227	894	819	1254	40.8441	1313	1300	3.31151	3.30598
3209019	4193	1323	868	846	1156	40.8777	422	853	1.06458	2.16975
3209013	4190	1214	791	966	1219	41.9332	946	430	2.38818	1.09456
3209015	4190	1234	909	924	1123	43.747	701	155	1.76968	0.394551
3209011	4188	1174	823	858	1333	40.1385	3453	4273	8.72128	10.8821
3209007	4186	1200	880	937	1169	43.4066	1989	4331	5.02604	11.0351
3209009	4186	1271	853	682	1380	36.6699	125	3397	0.315865	8.6553
3209001	4185	1253	867	870	1195	41.5054	4651	2266	11.7555	5.77498
3209003	4185	1425	749	673	1338	33.9785	732	156	1.85015	0.397571
3209005	4185	1263	764	778	1380	36.8459	261	4767	0.659683	12.1489
3208997	4184	1137	899	1019	1129	45.8413	1780	4801	4.50006	12.2384
3208999	4184	1190	829	873	1292	40.6788	608	3033	1.5371	7.73155
3208995	4183	1359	799	930	1095	41.334	3788	2029	9.57883	5.17345
3208993	4181	1293	918	865	1105	42.6453	23	416	0.0581886	1.0612
3208989	4180	1274	708	935	1263	39.3062	938	1948	2.37365	4.97048
3208991	4180	976	957	1000	1247	46.8182	217	1604	0.549128	4.09274
3208985	4179	1441	771	710	1257	35.4391	394	1471	0.997273	3.75428
3208987	4179	1099	967	1036	1077	47.9301	324	2674	0.820093	6.82457
3208983	4177	1140	970	907	1160	44.9366	484	1524	1.22566	3.89141
3208981	4176	1270	750	826	1330	37.7395	772	369	1.95545	0.942436
3208979	4176	1100	936	911	1229	44.2289	2	2334	0.00506594	5.9611
3208975	4174	1280	881	963	1050	44.1782	1075	3779	2.72425	9.65629
3208973	4173	1296	838	865	1174	40.81	291	1968	0.737624	5.02994
3208971	4172	1369	850	907	1046	42.1141	308	493	0.780903	1.26034
3208969	4170	1322	768	850	1230	38.801	476	248	1.20743	0.63431
3208965	4169	1206	801	894	1268	40.6572	3473	7576	8.81177	19.3818
3208967	4169	1212	792	978	1187	42.4562	1935	1970	4.90953	5.03988
3208963	4168	1337	734	832	1265	37.572	2610	2838	6.62374	7.26224
3208961	4168	1314	750	820	1284	37.6679	925	436	2.34749	1.11569
3208957	4167	1121	977	1011	1058	47.7082	2735	2773	6.94263	7.09761
3208959	4167	1258	800	889	1220	40.5328	2	1172	0.00507688	2.99978
3208949	4165	1249	768	906	1242	40.1921	3430	399	8.71103	1.02175
3208951	4165	1203	905	803	1254	41.0084	1450	1089	3.68251	2.78868
3208953	4165	1463	716	852	1134	37.6471	489	5012	1.24189	12.8346
3208955	4165	1168	1037	990	970	48.6675	236	1429	0.59936	3.65934
3208947	4161	1179	860	854	1268	41.192	267	1315	0.678741	3.37065
3208941	4159	1169	907	768	1315	40.2741	2484	2066	6.31761	5.29819
3208945	4159	1433	768	779	1179	37.1964	1677	4390	4.26515	11.258
3208939	4159	1367	786	875	1131	39.9375	915	2060	2.32714	5.2828
3208943	4159	1107	864	903	1285	42.4862	36	1761	0.0915596	4.51603
3208937	4157	1286	843	703	1325	37.1903	3	859	0.00763364	2.20394
3208935	4155	1263	851	769	1272	38.9892	640	77	1.62929	0.197654
3208933	4155	1206	890	769	1290	39.9278	326	655	0.829921	1.68134
3208931	4150	1469	704	659	1318	32.8434	95	958	0.24214	2.46209
3208929	4149	1211	796	863	1279	39.9855	3379	3658	8.6146	9.40343
3208927	4148	1296	719	737	1396	35.1013	2497	1531	6.36752	3.93661
3208925	4147	1300	848	821	1178	40.246	791	1748	2.01759	4.49566
3208921	4146	1293	712	914	1227	39.2185	4673	4332	11.9222	11.1441
3208923	4146	1270	718	842	1316	37.6266	1132	3362	2.88807	8.64877
3208919	4145	1363	790	666	1326	35.1267	2896	2836	7.39034	7.29739
3208915	4145	1190	788	832	1335	39.0832	669	1814	1.70723	4.66765
3208917	4145	1125	953	804	1263	42.3884	270	1188	0.689017	3.05688
3208911	4144	1095	982	853	1214	44.2809	1069	1769	2.72865	4.55296
3208907	4143	1353	748	896	1146	39.6814	2103	1925	5.36926	4.95566
3208909	4143	1249	840	934	1120	42.8192	389	679	0.993173	1.748
3208905	4142	1379	743	918	1102	40.1014	9	409	0.0229839	1.05317
3208901	4141	1143	882	871	1245	42.3328	748	533	1.91067	1.3728
3208903	4141	1396	761	759	1225	36.7061	654	300	1.67056	0.772684
3208897	4140	1270	923	790	1157	41.3768	1024	1094	2.61631	2.8184
3208889	4139	902	1018	905	1314	46.4605	830	904	2.12116	2.32948
3208891	4139	1302	759	767	1311	36.8688	680	37	1.73782	0.0953438
3208893	4139	1121	932	1086	1000	48.7557	566	6	1.44648	0.0154611
3208887	4138	1240	865	810	1223	40.4785	1332	2612	3.4049	6.73238
3208881	4138	1091	798	955	1294	42.3635	821	2062	2.09866	5.31477
3208883	4138	1261	783	877	1217	40.116	462	902	1.18098	2.32489
3208879	4137	1321	956	846	1014	43.5581	803	941	2.05315	2.426
3208871	4133	992	1053	752	1336	43.6729	1509	1160	3.86202	2.99349
3208875	4133	1237	829	834	1233	40.2371	1	478	0.00255932	1.23353
3208869	4132	1065	1124	1193	750	56.0745	1153	676	2.95161	1.74491
3208867	4130	1255	766	809	1300	38.1356	531	748	1.35999	1.93169
3208865	4129	763	1133	1143	1090	55.1223	417	812	1.06827	2.09748
3208863	4127	1142	846	932	1207	43.0821	1212	787	3.10641	2.03388
3208857	4126	1146	999	941	1040	47.0189	3843	3543	9.85216	9.15857
3208861	4126	1286	865	770	1205	39.6268	1020	1141	2.61494	2.94946
3208859	4126	1304	922	964	936	45.7101	358	702	0.917792	1.81465
3208855	4125	1245	925	761	1194	40.8727	3384	3188	8.67754	8.24291
3208847	4121	1068	924	960	1169	45.7171	3990	4801	10.2414	12.4255
3208845	4118	919	988	1028	1183	48.9558	1121	1062	2.87945	2.75058
3208841	4117	1197	905	751	1264	40.2235	171	706	0.439345	1.82898
3208839	4116	1106	868	1040	1102	46.3557	1103	896	2.83459	2.32177
3208835	4114	1156	970	762	1226	42.1001	1052	1683	2.70484	4.36321
3208837	4114	1252	765	962	1135	41.9786	13	827	0.0334249	2.14401
3208831	4112	1139	869	1010	1094	45.6955	3911	3295	10.0606	8.5465
3208829	4112	1314	810	868	1120	40.8074	2058	2322	5.29398	6.02275
3208833	4112	1141	960	754	1257	41.6829	1352	2357	3.47788	6.11354
3208827	4111	1351	805	794	1161	38.8956	2982	153	7.67274	0.396945
3208823	4109	1278	808	848	1175	40.3018	800	895	2.05942	2.32313
3208821	4107	1010	1031	769	1297	43.8276	736	720	1.89559	1.86979
3208815	4106	1265	666	701	1474	33.2927	477	369	1.22882	0.958503
3208813	4105	1248	830	813	1214	40.0244	159	542	0.409708	1.40823
3208811	4104	1374	767	743	1220	36.7934	898	388	2.31451	1.00835
3208809	4104	1343	832	880	1049	41.7154	872	634	2.2475	1.64766
3208807	4103	1097	922	856	1228	43.3341	11	6566	0.0283584	17.0681
3208803	4101	1257	846	989	1009	44.7452	1537	1218	3.96437	3.1677
3208801	4100	1320	712	694	1374	34.2927	1119	812	2.88693	2.11231
3208799	4098	1102	900	1107	989	48.9751	1756	1801	4.53255	4.68735
3208797	4096	1066	885	933	1212	44.3848	1043	1454	2.69349	3.78609
3208795	4096	1157	1062	1040	837	51.3184	999	802	2.57986	2.08834
3208793	4094	1221	757	902	1214	40.5227	1898	2741	4.90387	7.1408
3208791	4093	943	1072	741	1337	44.2951	483	463	1.24823	1.20649
3208789	4089	1291	884	796	1118	41.0858	4313	1277	11.1571	3.33089
3208785	4087	1185	757	794	1351	37.9496	1064	1741	2.75377	4.54339
3208783	4086	1399	805	764	1118	38.3994	747	823	1.9338	2.14826
3208781	4085	1223	802	965	1095	43.2558	794	897	2.05598	2.342
3208777	4085	1216	791	825	1253	39.5594	737	968	1.90838	2.52737
3208779	4085	1342	733	679	1331	34.5655	169	3811	0.437608	9.95022
3208773	4083	1230	789	770	1294	38.1827	9	1414	0.023316	3.69365
3208771	4082	1228	882	1019	953	46.5703	2170	1750	5.62312	4.57247
3208769	4081	1323	835	811	1112	40.3333	1249	288	3.23732	0.752683
3208765	4080	1251	836	739	1254	38.6029	1927	1135	4.99588	2.96703
3208763	4079	1185	895	755	1244	40.4511	102	1601	0.264507	4.18623
3208761	4078	1431	782	947	918	42.3982	1997	925	5.1799	2.41925
3208759	4078	1002	921	971	1184	46.3953	633	1420	1.6419	3.71387
3208757	4077	1174	738	710	1455	35.5163	728	539	1.88878	1.41005
3208753	4077	1237	699	763	1378	35.8597	628	516	1.62933	1.34988
3208755	4077	1040	934	961	1142	46.4803	435	978	1.1286	2.55849
3208751	4074	1289	914	744	1127	40.6971	1651	1734	4.28663	4.53956
3208749	4072	1294	786	949	1043	42.6081	376	1138	0.976721	2.98071
3208747	4071	1351	812	862	1046	41.1201	741	121	1.92534	0.317008
3208745	4068	1250	978	1142	698	52.1141	2279	1861	5.92589	4.87923
3208743	4067	1298	716	840	1213	38.2592	2205	2110	5.73489	5.53343
3208741	4067	940	1150	1071	906	54.6103	593	571	1.54231	1.49743
3208737	4065	1331	812	683	1239	36.7774	3649	4878	9.49519	12.7987
3208739	4065	1078	933	662	1392	39.2374	1237	417	3.21884	1.09411
3208733	4064	1315	742	818	1189	38.3858	4173	641	10.8614	1.68225
3208731	4064	1211	785	857	1211	40.4035	892	1215	2.32168	3.18866
3208735	4064	1350	758	705	1251	35.999	865	473	2.2514	1.24135
3208729	4063	1484	610	673	1296	31.5777	2115	92	5.50623	0.241505
3208727	4063	1452	659	706	1246	33.5959	965	899	2.5123	2.35993
3208725	4063	1176	877	738	1272	39.749	106	597	0.275962	1.56716
3208721	4062	1214	828	851	1169	41.3343	2562	1444	6.67159	3.79152
3208723	4062	1217	752	744	1349	36.8291	2109	1237	5.49196	3.248
3208719	4061	1136	798	839	1288	40.3103	1306	2468	3.40174	6.48184
3208717	4060	1283	757	812	1208	38.6453	70	834	0.182374	2.19092
3208711	4059	1157	763	798	1341	38.4577	1615	2349	4.20866	6.17234
3208715	4059	1241	832	759	1227	39.1968	1417	757	3.69268	1.98913
3208713	4059	1213	928	833	1085	43.3851	1071	1022	2.79101	2.68545
3208707	4058	1102	1004	979	973	48.8664	28	1448	0.0729855	3.80577
3208705	4057	1211	914	837	1095	43.16	2483	1765	6.47384	4.64008
3208701	4056	1218	746	745	1347	36.7604	4364	124	11.3809	0.326069
3208703	4056	1308	872	831	1045	41.9872	1350	1394	3.52068	3.66565
3208699	4055	1293	719	665	1378	34.1307	466	415	1.21559	1.09155
3208697	4051	1347	819	765	1120	39.1015	2736	34	7.14405	0.0895164
3208693	4050	1255	865	833	1097	41.9259	672	699	1.75511	1.84081
3208695	4050	765	1022	1060	1203	51.4074	369	1404	0.963744	3.69741
3208689	4049	1118	933	787	1211	42.4796	3348	2864	8.74637	7.54417
3208691	4049	1268	719	770	1292	36.7745	6	989	0.0156745	2.60516
3208687	4047	1224	767	767	1289	37.9046	2032	15923	5.31106	41.9641
3208683	4046	1179	715	775	1377	36.8265	1469	2439	3.84049	6.42942
3208685	4046	1187	866	931	1062	44.4142	276	622	0.721562	1.63965
3208681	4044	975	980	1005	1084	49.0851	1425	14806	3.7273	39.0492
3208679	4044	1033	934	812	1265	43.1751	590	649	1.54323	1.71167
3208677	4043	1264	675	691	1413	33.7868	1717	1947	4.49218	5.13627
3208675	4042	1312	713	847	1170	38.5948	15961	781	41.769	2.06082
3208673	4042	1050	929	808	1255	42.9738	2161	1925	5.65521	5.07949
3208671	4041	1244	706	874	1217	39.0992	1745	2581	4.56769	6.81216
3208669	4040	960	842	764	1474	39.7525	938	794	2.45591	2.09616
3208667	4040	1356	694	720	1270	35	12	4521	0.0314189	11.9355
3208665	4038	1280	715	809	1234	37.7415	4547	15566	11.911	41.1147
3208661	4035	1141	865	918	1111	44.1884	1712	834	4.48798	2.20449
3208659	4034	1287	762	675	1310	35.6222	8663	5815	22.7155	15.3745
3208657	4032	1256	708	658	1410	33.879	507	1272	1.33008	3.36475
3208655	4032	1258	804	698	1272	37.252	272	2530	0.713574	6.69246
3208651	4030	1283	763	848	1136	39.9752	695	1420	1.82419	3.75811
3208653	4030	1044	1045	917	1024	48.6849	413	570	1.08402	1.50854
3208647	4027	1265	663	842	1257	37.3727	2254	2875	5.92056	7.61451
3208645	4026	1364	736	799	1127	38.1272	13127	1363	34.4891	3.61084
3208643	4026	1074	891	843	1218	43.07	1443	539	3.79125	1.42791
3208641	4025	1341	736	792	1156	37.9627	2	5954	0.00525599	15.7772
3208637	4024	1283	836	699	1206	38.1461	2075	4204	5.45444	11.1427
3208635	4023	1343	697	950	1033	40.9396	4160	418	10.9379	1.10818
3208633	4023	1154	611	834	1424	35.9185	1314	1659	3.4549	4.39827
3208631	4019	1286	864	795	1074	41.2789	1158	5243	3.04776	13.9139
3208625	4018	1243	650	868	1257	37.78	2219	2611	5.84168	6.93079
3208627	4018	1226	788	817	1187	39.9452	9	1367	0.0236932	3.62865
3208623	4016	1229	803	746	1238	38.5707	2363	2135	6.22387	5.67009
3208621	4014	1327	778	702	1207	36.871	1335	349	3.51799	0.927329
3208619	4014	1049	1004	1039	922	50.8969	2	3084	0.00527039	8.19451
3208617	4013	913	981	978	1141	48.8163	1052	883	2.77292	2.34681
3208613	4013	1014	922	942	1135	46.449	723	765	1.90572	2.03319
3208615	4013	1020	900	806	1287	42.5118	355	523	0.935728	1.39001
3208611	4012	1162	792	959	1099	43.6441	857	3723	2.25949	9.89733
3208609	4011	1036	955	926	1094	46.896	470	4558	1.23947	12.1201
3208601	4009	1249	620	767	1373	34.5972	2659	1395	7.01573	3.71128
3208603	4009	1257	730	808	1214	38.3637	1336	1226	3.52501	3.26167
3208597	4007	1361	738	858	1050	39.8303	2132	44	5.62805	0.117117
3208599	4007	1249	738	668	1352	35.0886	171	1051	0.451406	2.7975
3208595	4007	1120	807	917	1163	43.0247	23	1023	0.0607154	2.72297
3208593	4006	1170	705	1044	1087	43.6595	631	1000	1.66613	2.66241
3208591	4003	1112	720	851	1320	39.2456	2826	2620	7.46753	6.98074
3208585	4002	1262	706	907	1127	40.3048	5767	7832	15.2427	20.8728
3208587	4002	1072	843	758	1329	40.005	590	620	1.55943	1.65234
3208579	4001	1059	944	840	1158	44.5889	1055	1333	2.78917	3.55343
3208581	4001	933	1080	1105	883	54.6113	624	1222	1.64971	3.25753
3208583	4001	1254	719	739	1289	36.4409	586	1174	1.54924	3.12958
3208577	4000	1142	656	757	1445	35.325	337	379	0.89117	1.01057
3208575	3998	1018	884	882	1214	44.1721	455	1656	1.20381	4.41777
3208573	3997	1083	906	956	1052	46.5849	1663	1119	4.40097	2.98595
3208569	3996	1396	710	657	1233	34.2092	1571	1443	4.15854	3.85147
3208571	3996	1349	645	862	1140	37.7127	574	245	1.51942	0.653923
3208565	3995	1247	814	643	1291	36.4706	1491	2226	3.94776	5.94284
3208567	3995	1239	905	733	1118	41.0013	543	257	1.43772	0.686123
3208561	3993	701	1228	885	1179	52.9176	4021	3650	10.6519	9.74944
3208557	3992	813	1179	1078	922	56.5381	3123	2120	8.27507	5.6641
3208559	3992	1113	757	894	1228	41.3577	503	658	1.33281	1.75801
3208555	3991	1226	711	769	1285	37.0834	2234	1212	5.92096	3.23897
3208551	3991	1289	818	712	1172	38.3363	595	941	1.57698	2.51474
3208553	3991	1214	814	801	1162	40.466	455	101	1.20592	0.269914
3208549	3989	1312	653	766	1258	35.5728	5783	9600	15.3349	25.6681
3208547	3989	1379	743	601	1266	33.6927	121	2787	0.320857	7.45176
3208543	3987	982	1021	1117	867	53.6243	2517	1643	6.67771	4.39519
3208545	3987	1315	718	825	1129	38.7008	1758	2033	4.66405	5.43847
3208539	3984	1037	917	929	1101	46.3353	1412	1906	3.74892	5.10258
3208541	3984	1301	684	728	1271	35.4418	6	2940	0.0159302	7.87071
3208531	3983	1165	815	754	1249	39.3924	8815	343	23.4101	0.91848
3208533	3983	1102	831	1000	1050	45.9704	3056	5189	8.11584	13.895
3208529	3983	1174	859	764	1186	40.7482	993	737	2.63712	1.97353
3208537	3983	1253	778	755	1197	38.4886	799	340	2.12191	0.910447
3208535	3983	1313	678	719	1273	35.0741	611	373	1.62264	0.998814
3208527	3982	1277	748	656	1301	35.2587	5323	4594	14.1399	12.3048
3208525	3982	1151	787	960	1084	43.8724	2448	2756	6.5028	7.38183
3208523	3980	1236	716	769	1259	37.3116	1737	1657	4.61644	4.44043
3208519	3979	912	1132	1122	813	56.6474	3229	4288	8.5839	11.4939
3208517	3979	1519	704	924	832	40.9148	650	664	1.72794	1.77984
3208521	3979	1321	674	738	1246	35.4863	383	445	1.01816	1.19281
3208511	3977	1103	847	911	1116	44.2042	1664	1517	4.42576	4.06833
3208507	3977	1151	935	744	1147	42.2178	1089	1633	2.89643	4.37942
3208509	3977	949	933	994	1101	48.4536	1048	2196	2.78738	5.88929
3208513	3977	1099	1051	964	863	50.6663	367	7931	0.976115	21.2696
3208505	3976	1030	908	920	1118	45.9759	405	682	1.07745	1.82946
3208503	3976	1204	725	694	1353	35.6891	2	959	0.00532076	2.57252
3208501	3974	1147	906	905	1016	45.5712	397	718	1.0567	1.927
3208495	3972	1240	755	838	1139	40.1057	1261	524	3.35812	1.40705
3208497	3972	1133	706	897	1236	40.3575	608	1972	1.61914	5.29522
3208493	3970	1060	887	836	1187	43.4005	3690	607	9.83165	1.63074
3208491	3970	871	943	840	1316	44.9118	1355	1528	3.61027	4.10505
3208489	3970	1175	811	906	1078	43.2494	658	4351	1.75318	11.6892
3208485	3969	1333	609	732	1295	33.7868	12063	854	32.1488	2.29489
3208487	3969	1108	878	946	1037	45.9562	2521	1470	6.71865	3.95023
3208483	3969	1021	906	966	1076	47.1655	644	534	1.71631	1.43498
3208481	3968	1336	665	687	1280	34.0726	2869	865	7.64802	2.32504
3208479	3968	1194	947	868	959	45.7409	1988	1374	5.2995	3.69318
3208477	3968	905	972	799	1292	44.6321	490	526	1.30622	1.41384
3208475	3967	1265	843	771	1088	40.6857	3681	2715	9.81508	7.29951
3208471	3966	1129	691	871	1275	39.3848	598	3818	1.59492	10.2676
3208473	3966	1532	669	834	931	37.8971	560	679	1.49357	1.82601
3208467	3965	1130	820	824	1191	41.4628	979	976	2.61174	2.62538
3208469	3965	1083	762	747	1373	38.058	640	60	1.70737	0.161396
3208463	3964	1263	802	698	1201	37.8406	1983	2233	5.29151	6.00815
3208465	3964	1219	847	883	1015	43.6428	494	827	1.31821	2.22514
3208459	3963	1206	813	857	1087	42.1398	1307	145	3.48853	0.390238
3208461	3963	1199	899	697	1168	40.2725	1179	1545	3.14688	4.15806
3208457	3962	1162	1020	1071	709	52.7764	751	1258	2.00501	3.38651
3208455	3962	1090	879	701	1292	39.8788	648	673	1.73002	1.8117
3208453	3961	1188	768	727	1278	37.743	132	19562	0.3525	52.6738
3208451	3960	1381	708	646	1225	34.1919	71	635	0.18965	1.71027
3208449	3958	1081	942	837	1098	44.9469	1022	2988	2.73128	8.05176
3208447	3956	1389	696	673	1198	34.6057	451	688	1.2059	1.85489
3208443	3954	994	996	873	1091	47.2686	1331	4065	3.56067	10.965
3208445	3954	1128	859	960	1007	46.004	387	2025	1.0353	5.46228
3208441	3953	1158	808	872	1115	42.4994	865	1508	2.31462	4.06875
3208439	3951	975	1013	916	1047	48.8231	643	734	1.72145	1.98141
3208437	3950	1097	872	852	1129	43.6456	1149	2362	3.0769	6.37777
3208435	3950	1183	795	967	1005	44.6076	597	690	1.5987	1.86311
3208433	3949	1323	665	791	1170	36.8701	414	271	1.10893	0.731928
3208431	3948	1023	897	886	1142	45.1621	1711	11509	4.5842	31.0918
3208427	3947	1158	740	775	1274	38.3836	2183	1649	5.85028	4.45594
3208429	3947	1029	996	769	1153	44.7175	459	39	1.23009	0.105386
3208421	3946	1025	1003	1010	908	51.0137	1006	1116	2.69669	3.01643
3208423	3946	814	1050	941	1141	50.4562	346	397	0.92749	1.07305
3208425	3946	1352	721	641	1232	34.516	252	1813	0.675513	4.90035
3208419	3945	1117	875	763	1190	41.5209	1428	1211	3.82888	3.27403
3208417	3945	1358	717	666	1204	35.057	1133	8294	3.0379	22.4235
3208415	3944	1337	892	658	1057	39.3002	1166	2423	3.12717	6.55243
3208409	3942	1142	800	720	1280	38.5591	2642	98	7.08935	0.265152
3208407	3942	1225	671	791	1255	37.0878	2620	1539	7.03032	4.16397
3208413	3942	1406	682	635	1219	33.4094	1807	3490	4.84877	9.44267
3208411	3942	1268	765	719	1190	37.6459	1318	88	3.53663	0.238096
3208401	3940	1376	800	638	1126	36.4975	1301	1103	3.49278	2.98583
3208405	3940	1229	708	825	1178	38.9086	1180	1519	3.16793	4.11195
3208403	3940	1313	611	736	1280	34.1878	207	3180	0.555731	8.60829
3208399	3939	1243	773	600	1323	34.8566	1000	778	2.68537	2.10659
3208397	3939	1216	691	734	1298	36.1767	1	583	0.00268537	1.57859
3208395	3938	897	1008	817	1216	46.3433	3337	2402	8.96336	6.50554
3208393	3936	1117	661	814	1344	37.4746	5594	10338	15.0334	28.0135
3208391	3935	944	961	860	1170	46.277	538	474	1.4462	1.28475
3208389	3934	1154	960	872	948	46.5684	2353	1780	6.32671	4.82583
3208387	3933	889	1062	840	1142	48.36	1401	1431	3.76795	3.88062
3208385	3932	1138	775	845	1174	41.2004	958	4962	2.57717	13.4595
3208381	3931	1199	774	696	1262	37.3951	515	38	1.38578	0.103102
3208383	3931	1254	769	762	1146	38.9468	35	372	0.0941793	1.00931
3208379	3930	1301	757	1040	832	45.7252	454	360	1.22195	0.977003
3208377	3929	1111	918	938	962	47.2385	3113	4059	8.38084	11.0185
3208375	3929	1107	885	810	1127	43.1407	1607	1482	4.32638	4.02302
3208373	3928	929	870	1004	1125	47.7088	416	437	1.12024	1.18658
3208371	3927	943	973	860	1151	46.6769	287	388	0.773057	1.0538
3208367	3926	1113	806	796	1211	40.8049	1810	56	4.87662	0.152133
3208369	3926	1222	784	703	1217	37.8757	877	1146	2.36287	3.11329
3208363	3925	1158	843	798	1126	41.8089	2012	1566	5.42224	4.25538
3208361	3925	1169	812	824	1120	41.6815	822	776	2.21525	2.10867
3208359	3924	1293	561	657	1413	31.0398	470	360	1.26695	0.978497
3208351	3923	1218	647	706	1352	34.4889	1564	1185	4.21705	3.22171
3208357	3923	1109	787	877	1150	42.4165	1254	1968	3.38119	5.35048
3208355	3923	995	854	833	1241	43.0028	602	417	1.62319	1.13371
3208349	3922	1251	618	759	1294	35.1096	3347	1926	9.0269	5.23763
3208345	3922	1115	799	784	1224	40.3621	2380	7613	6.41889	20.703
3208347	3922	1324	715	645	1238	34.6762	654	348	1.76385	0.946363
3208341	3921	1127	992	893	909	48.0745	1126	945	3.03761	2.57052
3208343	3921	1149	841	876	1055	43.7898	374	451	1.00894	1.22678
3208339	3920	1136	906	913	965	46.4031	677	2254	1.82681	6.13273
3208335	3919	1107	986	722	1104	43.5825	2398	5054	6.47238	13.7545
3208337	3919	1169	805	839	1106	41.9495	1278	232	3.44942	0.631391
3208333	3918	1220	839	802	1057	41.8836	15	10254	0.0404965	27.9135
3208331	3917	1159	745	846	1167	40.6178	3259	3729	8.80078	10.1537
3208329	3917	1248	746	648	1275	35.5885	2235	255	6.03552	0.694341
3208327	3916	1161	853	1006	896	47.4719	129	803	0.348448	2.18705
3208323	3915	1269	721	875	1050	40.7663	5386	4380	14.5521	11.9324
3208325	3915	1239	729	857	1090	40.5109	1668	1402	4.50666	3.81946
3208321	3914	990	827	871	1226	43.3827	481	1001	1.29991	2.72772
3208317	3913	1276	747	696	1194	36.8771	8229	7924	22.2448	21.5983
3208319	3913	1243	793	652	1225	36.9282	6529	2141	17.6493	5.8357
3208315	3913	1369	694	697	1153	35.5482	2040	2481	5.51456	6.76243
3208313	3912	1172	709	789	1242	38.2924	2187	3184	5.91344	8.68081
3208311	3911	1188	769	720	1234	38.0721	1993	1650	5.39026	4.49968
3208309	3911	1153	736	754	1268	38.0977	492	1405	1.33066	3.83155
3208307	3910	1442	685	835	948	38.8747	270	536	0.730428	1.46209
3208303	3908	1224	680	766	1238	37.001	356	409	0.963576	1.11623
3208301	3904	979	881	906	1138	45.7736	972	984	2.63358	2.68826
3208299	3903	1214	653	691	1345	34.435	197	812	0.533898	2.21893
3208297	3902	1361	726	706	1109	36.6991	907	15	2.45873	0.0410006
3208293	3901	1191	919	852	939	45.3986	3246	3464	8.80163	9.47083
3208295	3901	1226	768	850	1057	41.4765	2179	12	5.90842	0.0328089
3208291	3900	1134	871	682	1213	39.8205	928	1935	2.51695	5.29179
3208289	3899	1182	660	840	1217	38.4714	798	58	2.16491	0.158658
3208287	3899	1071	816	792	1220	41.2413	684	1281	1.85564	3.50414
3208285	3898	876	1203	1107	712	59.2612	450	312	1.22113	0.853687
3208281	3896	1071	875	810	1140	43.2495	11163	277	30.3077	0.75831
3208277	3895	1264	891	809	931	43.6457	1190	1070	3.23169	2.92996
3208271	3894	1150	718	839	1187	39.9846	3263	1341	8.86363	3.67298
3208275	3894	915	809	604	1566	36.2866	1082	177	2.93915	0.484801
3208273	3894	1134	795	1074	891	47.9969	1046	977	2.84136	2.67599
3208269	3893	984	848	985	1076	47.0845	659	763	1.79057	2.09038
3208263	3892	1127	809	865	1091	43.0113	1252	816	3.40269	2.23616
3208267	3892	1063	822	760	1247	40.6475	886	38	2.40797	0.104135
3208265	3892	1356	692	669	1175	34.9692	511	253	1.3888	0.69332
3208261	3891	1224	791	696	1180	38.2164	3456	1385	9.39513	3.79642
3208255	3889	1305	722	587	1275	33.659	1505	405	4.09345	1.11072
3208257	3889	1156	820	849	1064	42.9159	850	1204	2.31191	3.30198
3208259	3889	1278	614	694	1303	33.6333	346	548	0.941084	1.50289
3208251	3888	1175	843	732	1138	40.5093	1067	1654	2.90288	4.53728
3208253	3888	1140	825	688	1235	38.9146	258	948	0.701914	2.60057
3208249	3886	1027	806	815	1238	41.7138	1352	201	3.68014	0.55167
3208247	3885	1250	848	570	1217	36.4994	1252	670	3.40882	1.83937
3208241	3884	1141	654	680	1409	34.346	1240	2248	3.37701	6.1731
3208243	3884	1154	939	830	961	45.5458	469	458	1.27727	1.25769
3208245	3884	1048	920	756	1160	43.1514	285	1167	0.776169	3.20463
3208237	3883	1150	833	774	1126	41.3855	2053	3191	5.59258	8.76487
3208235	3882	1134	710	721	1317	36.8624	2771	2077	7.55043	5.70646
3208231	3881	1277	659	971	974	41.9995	1074	735	2.92719	2.0199
3208233	3881	1454	628	680	1119	33.7027	923	808	2.51564	2.22051
3208225	3880	1298	697	761	1124	37.5773	3537	1521	9.64259	4.18103
3208227	3880	1221	777	722	1160	38.634	1883	2991	5.13345	8.22187
3208219	3880	1266	673	721	1220	35.9278	410	1900	1.11774	5.22285
3208221	3880	1092	763	737	1288	38.6598	0	969	0	2.66366
3208217	3879	1096	827	835	1121	42.8461	232	1591	0.632643	4.37458
3208209	3878	1419	614	631	1214	32.1042	4394	6081	11.9851	16.7245
3208215	3878	1220	786	804	1068	41.0005	1076	2088	2.93491	5.7426
3208213	3878	1174	723	825	1156	39.9175	463	51	1.26288	0.140265
3208211	3878	1123	823	800	1132	41.8515	288	617	0.785552	1.69693
3208207	3877	1159	613	788	1317	36.1362	5276	8425	14.3946	23.1772
3208205	3877	1272	635	802	1168	37.0647	577	818	1.57424	2.25032
3208201	3876	1103	776	917	1080	43.6791	1009	2123	2.75358	5.84187
3208203	3876	1069	896	975	936	48.2714	857	1296	2.33877	3.56621
3208197	3875	786	1091	925	1073	52.0258	1449	1484	3.95537	4.08459
3208193	3873	1168	782	821	1102	41.3891	1062	688	2.90046	1.89464
3208195	3873	1256	842	771	1004	41.6473	1003	909	2.73933	2.50324
3208191	3873	1187	882	745	1059	42.0088	144	381	0.393283	1.04921
3208185	3872	938	781	631	1522	36.4669	1703	139	4.65232	0.382882
3208187	3872	1366	697	595	1214	33.3678	1296	531	3.54046	1.46267
3208189	3872	1189	743	842	1098	40.9349	140	2927	0.382457	8.06257
3208181	3870	1165	772	731	1202	38.8372	1778	1895	4.85972	5.22257
3208177	3869	1210	757	714	1188	38.0202	431	107	1.17834	0.294965
3208175	3868	1048	837	922	1061	45.4757	499	368	1.3646	1.01472
3208169	3864	995	1044	938	887	51.294	1400	1583	3.83249	4.36948
3208165	3862	1295	615	737	1215	35.0078	510	540	1.39685	1.49131
3208161	3861	1223	693	738	1207	37.0629	594	405	1.62734	1.11877
3208159	3859	1298	669	797	1095	37.9891	1437	533	3.93888	1.47312
3208155	3858	1101	947	920	890	48.3929	904	1801	2.47854	4.97895
3208153	3857	1319	801	724	1013	39.5385	1776	1914	4.87061	5.29271
3208151	3857	904	907	704	1342	41.7682	415	1211	1.13812	3.34873
3208149	3856	1235	780	756	1085	39.834	894	2727	2.4524	7.54283
3208147	3855	1187	694	819	1155	39.2477	3258	3062	8.93958	8.47163
3208143	3854	1201	705	761	1187	38.0384	17644	16341	48.4257	45.2223
3208145	3854	1043	937	906	968	47.8204	921	1240	2.52777	3.43159
3208141	3853	1097	827	745	1184	40.7994	1019	7396	2.79747	20.4731
3208139	3853	1220	760	881	992	42.5902	459	190	1.2601	0.525945
3208137	3852	1292	701	648	1211	35.0208	572	2142	1.57073	5.93088
3208133	3852	1079	888	940	945	47.4559	35	2235	0.0961108	6.18838
3208131	3849	1171	766	836	1076	41.6212	2106	2105	5.78763	5.83298
3208129	3849	1221	687	683	1258	35.5937	1758	1037	4.83127	2.87354
3208127	3848	1143	789	745	1171	39.8649	8688	15872	23.8822	43.9929
3208125	3847	1129	714	754	1250	38.1596	2278	1604	6.26357	4.44701
3208123	3847	1191	786	690	1180	38.3676	633	1317	1.74049	3.65132
3208119	3845	949	951	840	1105	46.58	1545	63	4.25033	0.174755
3208117	3845	1135	834	823	1053	43.0949	1271	4138	3.49655	11.4784
3208121	3845	1144	752	791	1158	40.13	267	482	0.734523	1.33702
3208113	3843	985	870	914	1074	46.4221	2886	10468	7.94358	29.0522
3208115	3843	1007	805	619	1412	37.0544	2132	2194	5.86823	6.08909
3208111	3842	859	1018	761	1204	46.304	1586	901	4.36653	2.50123
3208107	3841	1135	784	908	1014	44.051	2323	3664	6.39728	10.1741
3208109	3841	1020	784	727	1310	39.3387	798	463	2.1976	1.28565
3208103	3840	1090	798	801	1151	41.6406	1319	984	3.63332	2.73306
3208105	3840	1031	761	713	1335	38.3854	32	661	0.0881473	1.83593
3208101	3838	1018	715	773	1332	38.7702	129	1038	0.355529	2.88455
3208099	3837	1210	700	803	1124	39.1712	561	380	1.54654	1.05628
3208097	3836	1282	655	712	1187	35.6361	1011	2622	2.78781	7.29021
3208093	3836	1118	799	734	1185	39.9635	995	851	2.74369	2.36612
3208095	3836	1100	878	852	1006	45.0991	655	342	1.80615	0.950897
3208089	3835	1153	701	811	1170	39.4263	1935	139	5.33711	0.386576
3208091	3835	1332	700	646	1157	35.0978	72	2349	0.19859	6.53286
3208085	3834	1164	811	751	1108	40.7407	1698	1669	4.68464	4.64291
3208081	3833	1183	830	796	1024	42.4211	3485	2834	9.61733	7.88582
3208083	3833	1036	906	782	1109	44.0386	458	239	1.26391	0.665036
3208075	3831	1255	715	647	1214	35.5521	1782	2043	4.92024	5.68777
3208073	3831	1313	710	649	1159	35.4738	1748	912	4.82636	2.53903
3208079	3831	1126	693	779	1233	38.4234	1382	2159	3.81581	6.01072
3208077	3831	1190	817	937	887	45.7844	453	1319	1.25077	3.67213
3208071	3830	1188	804	653	1185	38.0418	1357	1141	3.74776	3.17741
3208067	3829	1178	814	604	1233	37.0332	4755	3009	13.1358	8.38152
3208069	3829	1467	608	839	915	37.7905	876	751	2.41997	2.0919
3208065	3828	1214	703	664	1247	35.7106	502	394	1.38715	1.09777
3208063	3827	901	1034	1075	817	55.1084	2663	1430	7.36043	3.98532
3208061	3827	1139	801	718	1169	39.6917	1234	1190	3.41073	3.31646
3208053	3824	1060	845	707	1212	40.5858	4600	4851	12.7242	13.53
3208059	3824	1155	973	811	885	46.6527	1617	1262	4.47283	3.51988
3208055	3824	1192	839	972	821	47.3588	405	709	1.12028	1.97749
3208057	3824	1098	821	878	1027	44.4299	173	1280	0.47854	3.57008
3208051	3823	1284	692	692	1155	36.2019	2065	316	5.71355	0.881594
3208049	3823	1222	850	653	1098	39.3147	1645	940	4.55147	2.62246
3208047	3822	1175	731	745	1171	38.6185	1730	4573	4.78791	12.7613
3208045	3820	918	849	878	1175	45.2094	489	1636	1.35405	4.56779
3208039	3819	1090	748	797	1184	40.4556	1836	1460	5.08526	4.07745
3208041	3819	1264	732	659	1164	36.4231	956	734	2.64788	2.0499
3208043	3819	1078	721	785	1235	39.4344	173	476	0.479167	1.32936
3208037	3818	1010	859	870	1079	45.2855	1819	1181	5.0395	3.29913
3208033	3816	1238	723	621	1234	35.2201	5679	3265	15.7418	9.12559
3208029	3816	1151	656	765	1244	37.2379	3524	1009	9.76828	2.82013
3208031	3816	1156	756	847	1057	42.0073	2360	392	6.54175	1.09563
3208025	3815	1175	787	705	1148	39.1088	2917	4030	8.08784	11.2667
3208027	3815	1126	741	708	1240	37.9817	194	520	0.537895	1.45377
3208021	3813	1266	721	592	1234	34.4348	4426	6027	12.2782	16.8586
3208023	3813	1318	666	638	1191	34.1988	1182	810	3.279	2.26571
3208019	3813	1186	750	787	1090	40.3095	570	1162	1.58124	3.25031
3208017	3813	1051	726	793	1243	39.8374	6	11104	0.0166447	31.0598
3208015	3812	1113	819	828	1052	43.2057	1221	1229	3.38808	3.43863
3208013	3812	1111	754	827	1120	41.4743	308	1615	0.85465	4.51862
3208007	3811	1179	706	837	1089	40.4881	855	895	2.37311	2.50478
3208011	3811	959	774	772	1306	40.5668	266	401	0.7383	1.12225
3208003	3809	1169	713	742	1185	38.199	189	732	0.524857	2.04968
3208001	3808	1149	795	780	1084	41.3603	511	10	1.41943	0.0280084
3207999	3807	996	995	1041	775	53.4804	81	439	0.225057	1.22989
3207995	3806	1060	734	781	1231	39.8056	2173	2405	6.03923	6.73957
3207997	3806	655	1215	1086	850	60.4572	2054	1322	5.7085	3.70466
3207993	3805	1279	855	654	1017	39.6583	4453	745	12.3791	2.08827
3207991	3804	1274	802	795	933	41.9821	480	20	1.33472	0.0560758
3207989	3803	1005	937	681	1180	42.5454	57	717	0.15854	2.01085
3207985	3801	922	852	704	1323	40.9366	1	439	0.00278287	1.23184
3207983	3799	1085	835	752	1127	41.7742	890	1343	2.47806	3.77045
3207975	3798	1265	702	777	1054	38.9415	2194	6740	6.11043	18.9274
3207981	3798	1247	759	711	1081	38.7046	402	434	1.1196	1.21877
3207979	3798	955	784	731	1328	39.8894	35	693	0.0974773	1.9461
3207971	3796	1117	604	802	1273	37.039	4220	2598	11.7592	7.2996
3207967	3796	1196	738	864	998	42.2023	1999	168	5.57028	0.472029
3207969	3796	993	714	786	1303	39.5153	601	564	1.67471	1.58467
3207965	3795	1094	707	747	1247	38.3136	4198	3031	11.7009	8.51844
3207959	3793	1183	685	805	1120	39.2829	3078	2740	8.58373	7.70466
3207961	3793	1120	754	735	1184	39.2565	1211	1640	3.37716	4.61155
3207963	3793	1045	812	739	1197	40.8911	753	395	2.09992	1.11071
3207953	3792	1278	701	661	1152	35.9177	1135	827	3.16605	2.32607
3207957	3792	1225	665	925	977	41.9304	234	2067	0.652737	5.81377
3207949	3790	1213	637	611	1329	32.9288	2796	144	7.80348	0.405237
3207951	3790	1377	724	529	1160	33.0607	1181	411	3.29611	1.15661
3207947	3789	1154	697	769	1169	38.6909	896	3164	2.50135	8.90631
3207939	3787	1154	810	605	1218	37.3647	1449	3154	4.04728	8.88285
3207945	3787	1326	653	671	1137	34.9617	976	1042	2.72612	2.93466
3207943	3787	1287	702	633	1165	35.2522	645	1208	1.80159	3.40218
3207937	3786	1098	852	798	1038	43.5816	1660	1768	4.63786	4.98067
3207935	3786	1188	680	661	1257	35.42	143	13076	0.399527	36.8367
3207927	3785	674	1225	942	944	57.2523	3752	1692	10.4855	4.76783
3207929	3785	1017	1004	834	930	48.5601	1766	1005	4.93532	2.83195
3207933	3785	1108	839	845	993	44.4914	1650	1304	4.61114	3.67449
3207931	3785	1257	736	612	1180	35.6143	1389	1721	3.88174	4.84954
3207925	3784	1272	716	627	1169	35.4915	3322	6191	9.28622	17.45
3207923	3784	1092	705	718	1269	37.6057	1110	785	3.10286	2.21261
3207921	3781	1293	737	637	1114	36.3396	825	887	2.30801	2.50209
3207919	3780	1160	613	763	1244	36.4021	1530	866	4.28144	2.4435
3207917	3778	1104	807	789	1078	42.2446	713	1160	1.99626	3.27478
3207911	3777	904	918	861	1094	47.1009	3801	3715	10.6449	10.4905
3207913	3777	1127	757	734	1159	39.4758	753	64	2.10881	0.180725
3207909	3776	1206	808	931	831	46.054	675	567	1.89087	1.60154
3207901	3775	1179	819	783	994	42.4371	2810	2467	7.87372	6.97009
3207899	3775	652	1058	779	1286	48.6623	2591	3183	7.26007	8.99302
3207905	3775	1337	779	761	898	40.7947	745	838	2.08752	2.36763
3207891	3774	1201	700	780	1093	39.2157	1155	2129	3.23721	6.01672
3207893	3774	939	878	924	1033	47.7477	612	188	1.7153	0.531303
3207885	3773	1189	855	688	1041	40.8958	3223	7196	9.03574	20.3418
3207887	3773	1220	641	726	1186	36.2311	579	546	1.62324	1.54345
3207889	3773	1025	838	751	1159	42.115	1	659	0.00280352	1.86288
3207881	3772	1121	885	1034	732	50.8749	935	1200	2.62199	3.39309
3207879	3772	1347	691	631	1103	35.0477	400	493	1.12171	1.39399
3207883	3772	1033	732	743	1264	39.1039	48	561	0.134605	1.58627
3207877	3771	1059	814	828	1070	43.5428	2354	4161	6.60299	11.7687
3207875	3771	1197	747	781	1046	40.5198	86	455	0.241231	1.28689
3207873	3770	1076	800	848	1046	43.7135	46	572	0.129065	1.61823
3207871	3769	881	960	1067	861	53.7808	1670	2316	4.68685	6.55388
3207867	3768	1267	712	728	1061	38.2166	1005	3618	2.82128	10.241
3207869	3768	1200	820	779	969	42.4363	573	1886	1.60855	5.33847
3207861	3767	906	891	887	1083	47.1994	4030	358	11.3162	1.01362
3207857	3767	1162	810	750	1045	41.4123	1170	147	3.28534	0.416205
3207863	3767	935	934	843	1055	47.1728	873	488	2.45137	1.38169
3207859	3767	1181	785	995	806	47.2525	582	421	1.63425	1.19199
3207865	3767	1118	781	801	1067	41.9963	579	699	1.62582	1.9791
3207855	3764	887	867	614	1396	39.3464	696	318	1.95592	0.90108
3207853	3763	1187	688	696	1192	36.7792	2598	1616	7.3029	4.58029
3207851	3762	992	789	758	1223	41.1217	881	318	2.47712	0.901559
3207847	3761	1323	645	543	1250	31.5873	1487	1500	4.18213	4.25377
3207849	3761	1073	729	691	1268	37.7559	1184	519	3.32996	1.4718
3207845	3760	985	971	835	969	48.0319	669	920	1.88204	2.60967
3207839	3760	1076	822	859	1003	44.7074	2	2188	0.00562643	6.20648
3207833	3759	1301	675	609	1174	34.158	1717	1525	4.83157	4.32697
3207837	3759	1102	671	899	1087	41.7664	1132	1963	3.1854	5.56973
3207835	3759	1328	689	635	1107	35.2221	356	221	1.00177	0.627055
3207831	3758	1181	723	656	1198	36.6951	307	502	0.864116	1.42473
3207827	3757	1274	679	614	1190	34.4158	1113	4299	3.13361	12.2043
3207823	3755	1047	807	787	1114	42.4501	3783	13261	10.6566	37.6662
3207825	3755	1190	755	742	1068	39.8668	387	5501	1.09016	15.6249
3207813	3754	1243	725	862	924	42.2749	1879	1897	5.29448	5.38963
3207821	3754	1268	707	583	1196	34.3633	1341	2508	3.77855	7.12556
3207819	3754	958	788	717	1291	40.0906	923	12442	2.60075	35.3494
3207803	3752	1026	750	896	1080	43.8699	1965	358	5.53975	1.01767
3207807	3752	955	844	772	1181	43.0704	1277	234	3.60013	0.66518
3207811	3752	1173	747	617	1215	36.3539	545	822	1.53647	2.33666
3207809	3752	1016	612	875	1249	39.6322	343	741	0.966989	2.1064
3207805	3752	1028	752	847	1125	42.6173	281	923	0.792198	2.62376
3207801	3750	980	848	919	1003	47.12	1214	1779	3.42435	5.05977
3207799	3750	1036	788	878	1048	44.4267	632	709	1.78269	2.01651
3207797	3749	1312	681	634	1122	35.076	442	536	1.24709	1.52488
3207795	3748	1091	823	759	1075	42.2092	735	49	2.07433	0.139438
3207793	3748	1079	707	823	1139	40.8218	66	1914	0.186267	5.44664
3207791	3746	1218	724	678	1126	37.4266	3154	1356	8.90603	3.8608
3207787	3745	1123	689	669	1264	36.2617	1075	1267	3.03632	3.60837
3207789	3745	1086	781	701	1177	39.5728	1000	1052	2.82448	2.99606
3207785	3744	1016	802	807	1119	42.9754	2701	2270	7.63096	6.4666
3207783	3743	930	867	863	1083	46.2196	1561	167	4.41137	0.475864
3207781	3742	1023	845	758	1116	42.8381	3375	2064	9.54026	5.88291
3207779	3742	1061	792	800	1089	42.5441	845	1942	2.3886	5.53518
3207773	3741	1145	761	695	1140	38.9201	2536	2357	7.17054	6.71982
3207775	3741	864	983	888	1006	50.0134	2110	823	5.96603	2.34638
3207777	3741	1279	681	648	1133	35.5253	409	853	1.15645	2.43191
3207767	3740	1127	670	851	1092	40.6684	5430	4606	15.3574	13.1352
3207769	3740	1115	687	799	1139	39.7326	2692	1303	7.61367	3.71586
3207771	3740	933	890	779	1138	44.6257	1308	410	3.69936	1.16923
3207763	3739	1095	793	730	1121	40.7328	2016	2070	5.70329	5.90474
3207765	3739	1239	708	653	1139	36.4001	612	1178	1.73136	3.36028
3207759	3738	1295	690	558	1195	33.3868	1888	809	5.34261	2.30832
3207755	3737	1097	756	920	964	44.8488	2781	2633	7.8717	7.51474
3207757	3737	1056	826	657	1198	39.6842	8	4321	0.0226442	12.3324
3207753	3736	1062	810	793	1071	42.9069	1219	1066	3.45134	3.04324
3207749	3734	859	860	916	1099	47.5629	2429	181	6.88087	0.517
3207745	3734	1050	718	807	1159	40.8409	1685	1329	4.77327	3.79609
3207751	3734	1202	780	800	952	42.3139	631	486	1.7875	1.38819
3207747	3734	840	1000	958	936	52.4371	399	471	1.13029	1.34534
3207743	3733	1029	848	713	1143	41.8162	2767	2124	7.84046	6.06852
3207741	3733	1132	823	837	941	44.4683	1199	1265	3.39744	3.61425
3207739	3733	1144	730	747	1112	39.566	604	1089	1.71147	3.1114
3207737	3733	973	688	823	1249	40.4768	0	576	0	1.6457
3207733	3732	817	991	805	1119	48.1243	1430	932	4.05308	2.66355
3207735	3732	778	959	1096	899	55.0643	733	1050	2.07756	3.00078
3207731	3731	928	941	737	1125	44.9745	2036	1697	5.77222	4.85113
3207725	3729	1141	726	654	1208	37.0072	1263	1251	3.58263	3.57809
3207727	3729	1144	647	643	1295	34.5937	1059	1104	3.00396	3.15764
3207729	3729	1062	811	681	1175	40.0107	249	1170	0.706313	3.34641
3207723	3729	1087	703	767	1172	39.4208	99	640	0.280823	1.83052
3207721	3728	983	945	715	1085	44.5279	1084	1362	3.0757	3.89661
3207719	3726	1218	671	794	1043	39.3183	1121	1779	3.18239	5.09236
3207717	3725	1026	883	763	1053	44.1879	3431	514	9.74282	1.47171
3207715	3724	922	941	901	960	49.4629	652	1133	1.85195	3.24494
3207711	3723	1147	699	663	1214	36.5834	1608	906	4.5686	2.5955
3207713	3723	1142	771	681	1129	39.0008	1305	908	3.70773	2.60123
3207709	3721	1158	685	752	1126	38.6187	491	801	1.39576	2.29593
3207697	3719	721	982	768	1248	47.0557	3746	798	10.6545	2.28856
3207705	3719	1173	791	736	1019	41.0594	3461	104	9.84387	0.298259
3207703	3719	1074	821	771	1053	42.8072	1799	1047	5.11676	3.00266
3207701	3719	994	801	828	1096	43.8021	915	900	2.60247	2.58108
3207699	3719	1024	842	810	1043	44.4205	707	646	2.01087	1.85265
3207695	3719	921	860	751	1187	43.3181	451	507	1.28275	1.45401
3207707	3719	1210	745	629	1135	36.9454	434	986	1.23439	2.82772
[truncated: 41,387 more rows]
